# Supplementary material
Source: HighWire-hosted journal article supplement (https://rmdopen.bmj.com/content/9/1/e002694)
Supplement: inline-supplementary-material-1 [file inline-supplementary-material-1.pdf]

**Supplementary Table 3. Significant robust DEGs identified by the RRA analysis**

| Outcomes                      | Number | Genes                                                                                                                                                                                                                                                                                                                                                                                                                                                                              |
|-------------------------------|--------|------------------------------------------------------------------------------------------------------------------------------------------------------------------------------------------------------------------------------------------------------------------------------------------------------------------------------------------------------------------------------------------------------------------------------------------------------------------------------------|
| Up-regulated genes in blood   | 64     | <i>IFI44L, RSAD2, IFI44, IFI27, EPSTI1, IFIT1, IFIT3, IFI6, XAF1, MX1, USP18, LY6E, OAS1, SERPING1, OASL, OAS2, ANKRD22, IFIT2, ISG15, LGALS3BP, CXCL10, TNFSF13B, LAMP3, TNFAIP6, BLVRA, HERC5, IFIH1, CASP1, GBP1, IRF7, ETV7, PLSCR1, PARP12, EPB41L3, LAP3, HERC6, DDX58, CHMP5, PARP9, CCL2, DDX60, OAS3, FBXO6, RTP4, HES4, SPATS2L, CDCA7, HNMT, EIF2AK2, SCO2, CLEC4D, MS4A4A, OTOF, IFIT5, TRIM5, TCL1A, CMPK2, UBE2L6, BATF2, APOBEC3A, MX2, SAMD9L, TRIM22, SLC38A6</i> |
| Down-regulated genes in blood | 8      | <i>LRRN3, LDLRAP1, KIAA1324, ALDOC, CTDSPL, CD248, TNFSF14, HLA-DRB1</i>                                                                                                                                                                                                                                                                                                                                                                                                           |

|                                            |     |                                                                                                                                                                                                                                                                                                                                                                                                                                                                                                                                                                                                                                                                                                                                                                                                                                                                     |
|--------------------------------------------|-----|---------------------------------------------------------------------------------------------------------------------------------------------------------------------------------------------------------------------------------------------------------------------------------------------------------------------------------------------------------------------------------------------------------------------------------------------------------------------------------------------------------------------------------------------------------------------------------------------------------------------------------------------------------------------------------------------------------------------------------------------------------------------------------------------------------------------------------------------------------------------|
| Up-regulated genes in glandular tissues    | 116 | <p><i>CXCL9, PTPRC, CXCL10, CXCL13, IFI44L, SAMHD1, CXCL11, XAF1, IFIT3, CCL19, ADAMDEC1, GIMAP2, GZMK, GIMAP7, GBP1, MS4A1, HLA-DRA, STAT1, SAMSNI, TAP1, B2M, SAMD9, FGL2, CD52, SAMD9L, EPSTI1, GZMA, MMP9, LAMP3, IFIT1, HLA-F, SLAMF7, CD38, EVI2A, EVI2B, IFI44, BANK1, RSAD2, MX1, MPEG1, NLRC5, HLA-DPA1, LGALS2, LAX1, PECAMI, CCR5, SP110, IFIH1, GPR171, DOCK8, GBP3, GBP5, TNFSF13B, BCL2A1, HLA-B, ITGA4, ZNF267, HCP5, TAGAP, P2RY8, CXCR4, HLA-DQA1, CTSS, TRIM22, DOCK2, IFI6, HCLS1, HERC6, IL2RB, CMPK2, ISG15, VCAMI, CCRI, GMFG, TNFAIP8, SNX10, CD163, ST8SIA4, GPR18, CD2, GIMAP4, FYB, TFRC, RASGRP1, PAG1, LBR, MS4A7, PSMB9, CLEC2B, HLA-E, HERC5, CRTAM, CD69, LIPA, C16orf54, CCL18, NLRC3, EMB, IL10RA, KLHL6, CCDC109B, ICOS, CD74, GBP2, PPP1R16B, ITK, IFI27, KLRB1, AIM2, CDC42SE2, BTN3A3, CCL5, BLNK, PLCG2, RTP4, DNAJB9</i></p> |
| Down- regulated genes in glandular tissues | 7   | <p><i>SCGB3A1, SPDEF, KLK1, NME4, MYL2, CD151, DEFB1</i></p>                                                                                                                                                                                                                                                                                                                                                                                                                                                                                                                                                                                                                                                                                                                                                                                                        |

---

(In the RRA analysis of transcriptome data, genes with pooled  $\log_2FC > 0.5$  and adjusted  $P$  value  $< 0.05$  were considered as the significant robust DEGs in the RRA analysis. DEGs, differentially expressed genes.)
