# Supplementary material
Source: HighWire-hosted journal article supplement (https://rmdopen.bmj.com/content/9/1/e002694)
Supplement: inline-supplementary-material-3 [file inline-supplementary-material-3.pdf]

**Supplementary Table 2. Summary of transcriptome datasets of salivary glandular tissues of patients with SjS**

| <b>GEO ID</b> | <b>Participants</b>                                                                                                                      | <b>Samples</b>               | <b>Techniques</b> | <b>Platforms</b>              | <b>Outcomes</b>      |
|---------------|------------------------------------------------------------------------------------------------------------------------------------------|------------------------------|-------------------|-------------------------------|----------------------|
| Present study | 4 SjS patients and 4 age- and gender-matched non-SjS controls                                                                            | Labial minor salivary glands | Array             | Affymetrix Human Genome Array | Expression profiling |
| GSE40568      | 5 female SjS patients (Focus score $\geq 1$ ) and 3 female healthy controls                                                              | Labial minor salivary glands | Array             | GPL570                        | Expression profiling |
| GSE127952     | 8 female SjS patients (Focus score: $\leq 2$ ; Mean age: 50.5 years) and 6 female healthy volunteers (Mean age: 42 years)                | Labial minor salivary glands | Array             | GPL20995                      | Expression profiling |
| GSE23117      | 10 SjS patients (ages 27-63 years) and 5 gender-matched non-SjS sicca controls (ages 30-54 years)                                        | Labial minor salivary glands | Array             | GPL570                        | Expression profiling |
| GSE40611      | 17 SjS (Mean age: 49.0 years), 14 non-SjS sicca patients (Mean age: 52.8 years) and 18 non-sicca control patients (Mean age: 59.0 years) | Parotid gland tissues        | Array             | GPL570                        | Expression profiling |
| GSE80805      | 2 female SjS patients and 2 female non-SjS sicca controls                                                                                | Labial minor salivary glands | Array             | GPL13667                      | Expression profiling |
