# Supplementary material
Source: HighWire-hosted journal article supplement (https://rmdopen.bmj.com/content/9/1/e002694)
Supplement: inline-supplementary-material-5 [file inline-supplementary-material-5.pdf]

**Supplementary Table 4. Significantly enriched pathways in the GSEA of peripheral blood**

| Pathway name                                                         | Size | Enrichment score | Normalized enrichment score | NOM p-val | FDR q-val |
|----------------------------------------------------------------------|------|------------------|-----------------------------|-----------|-----------|
| HALLMARK_INTERFERON_ALPHA_RESPONSE                                   | 95   | 0.865            | 1.914                       | <0.0001   | <0.0001   |
| HALLMARK_INTERFERON_GAMMA_RESPONSE                                   | 198  | 0.808            | 1.805                       | <0.0001   | <0.0001   |
| REACTOME_INTERFERON_ALPHA_BETA_SIGNALING                             | 68   | 0.840            | 1.786                       | <0.0001   | 0.003     |
| GO_NEGATIVE_REGULATION_OF_VIRAL_LIFE_CYCLE                           | 78   | 0.806            | 1.735                       | <0.0001   | 0.004     |
| GO_NEGATIVE_REGULATION_OF_VIRAL_GENOME_REPLICATION                   | 55   | 0.824            | 1.745                       | <0.0001   | 0.004     |
| GO_RESPONSE_TO_TYPE_I_INTERFERON                                     | 94   | 0.810            | 1.747                       | <0.0001   | 0.009     |
| GO_NEGATIVE_REGULATION_OF_VIRAL_PROCESS                              | 94   | 0.782            | 1.701                       | <0.0001   | 0.009     |
| GO_REGULATION_OF_VIRAL_GENOME_REPLICATION                            | 91   | 0.774            | 1.696                       | <0.0001   | 0.009     |
| GO_DEFENSE_RESPONSE_TO_VIRUS                                         | 236  | 0.751            | 1.680                       | <0.0001   | 0.013     |
| HALLMARK_INFLAMMATORY_RESPONSE                                       | 199  | 0.647            | 1.436                       | <0.0001   | 0.017     |
| HALLMARK_E2F_TARGETS                                                 | 196  | 0.640            | 1.427                       | <0.0001   | 0.017     |
| HALLMARK_APOPTOSIS                                                   | 160  | 0.644            | 1.417                       | <0.0001   | 0.017     |
| HALLMARK_IL6_JAK_STAT3_SIGNALING                                     | 87   | 0.665            | 1.438                       | 0.001     | 0.021     |
| GO_REGULATION_OF_VIRAL_LIFE_CYCLE                                    | 138  | 0.747            | 1.656                       | <0.0001   | 0.024     |
| HALLMARK_TNFA_SIGNALING_VIA_NFKB                                     | 199  | 0.646            | 1.441                       | <0.0001   | 0.025     |
| REACTOME_INTERFERON_SIGNALING                                        | 200  | 0.737            | 1.650                       | <0.0001   | 0.032     |
| HALLMARK_G2M_CHECKPOINT                                              | 192  | 0.609            | 1.354                       | <0.0001   | 0.048     |
| GO_NEGATIVE_REGULATION_OF_MULTI_ORGANISM_PROCESS                     | 210  | 0.726            | 1.629                       | <0.0001   | 0.050     |
| GO_VIRAL_GENOME_REPLICATION                                          | 118  | 0.733            | 1.617                       | <0.0001   | 0.056     |
| HALLMARK_IL2_STAT5_SIGNALING                                         | 198  | 0.600            | 1.334                       | 0.002     | 0.057     |
| GO_RESPONSE_TO_INTERFERON_ALPHA                                      | 20   | 0.856            | 1.620                       | 0.001     | 0.058     |
| GO_RESPONSE_TO_VIRUS                                                 | 315  | 0.716            | 1.603                       | <0.0001   | 0.075     |
| REACTOME_INTERFERON_GAMMA_SIGNALING                                  | 91   | 0.730            | 1.601                       | <0.0001   | 0.080     |
| GO_INTERFERON_GAMMA_MEDIATED_SIGNALING_PATHWAY                       | 87   | 0.732            | 1.597                       | <0.0001   | 0.082     |
| HALLMARK_SPERMATOGENESIS                                             | 133  | 0.591            | 1.304                       | 0.004     | 0.084     |
| GO_REGULATION_OF_SYMBIOSIS_ENCOMPASSING_MUTUALISM_THROUGH_PARASITISM | 212  | 0.714            | 1.590                       | <0.0001   | 0.090     |
| HALLMARK_XENOBIOTIC_METABOLISM                                       | 198  | 0.575            | 1.282                       | 0.002     | 0.108     |
| HALLMARK_REACTIVE_OXYGEN_SPECIES_PATHWAY                             | 48   | 0.589            | 1.243                       | 0.121     | 0.111     |
| HALLMARK_MTORC1_SIGNALING                                            | 196  | 0.556            | 1.240                       | 0.019     | 0.111     |
| HALLMARK_COMPLEMENT                                                  | 200  | 0.556            | 1.244                       | 0.019     | 0.116     |
| HALLMARK_MYC_TARGETS_V1                                              | 196  | 0.566            | 1.265                       | 0.011     | 0.118     |
| HALLMARK_KRAS_SIGNALING_DN                                           | 196  | 0.568            | 1.270                       | 0.009     | 0.119     |
| HALLMARK_ESTROGEN_RESPONSE_LATE                                      | 198  | 0.562            | 1.245                       | 0.009     | 0.120     |

---

|                                                    |     |       |       |       |       |
|----------------------------------------------------|-----|-------|-------|-------|-------|
| HALLMARK_ANDROGEN_RESPONSE                         | 97  | 0.579 | 1.247 | 0.054 | 0.124 |
| HALLMARK_KRAS_SIGNALING_UP                         | 198 | 0.556 | 1.250 | 0.015 | 0.126 |
| HALLMARK_ALLOGRAFT_REJECTION                       | 195 | 0.549 | 1.227 | 0.024 | 0.127 |
| HALLMARK_FATTY_ACID_METABOLISM                     | 157 | 0.563 | 1.254 | 0.025 | 0.128 |
| HALLMARK_P53_PATHWAY                               | 196 | 0.541 | 1.206 | 0.035 | 0.153 |
| HALLMARK_OXIDATIVE_PHOSPHORYLATION                 | 185 | 0.544 | 1.209 | 0.043 | 0.155 |
| GO_RESPONSE_TO_INTERFERON_GAMMA                    | 195 | 0.697 | 1.559 | 0.000 | 0.182 |
| HALLMARK_UNFOLDED_PROTEIN_RESPONSE                 | 109 | 0.537 | 1.188 | 0.098 | 0.187 |
| HALLMARK_HEDGEHOG_SIGNALING                        | 35  | 0.579 | 1.184 | 0.209 | 0.189 |
| GO_REGULATION_OF_DEFENSE_RESPONSE_TO_VIRUS_BY_HOST | 35  | 0.765 | 1.550 | 0.000 | 0.194 |
| GO_RESPONSE_TO_INTERFERON_BETA                     | 28  | 0.793 | 1.552 | 0.001 | 0.201 |

---
