# Supplementary material
Source: HighWire-hosted journal article supplement (https://rmdopen.bmj.com/content/9/1/e002694)
Supplement: inline-supplementary-material-6 [file inline-supplementary-material-6.pdf]

**Supplementary Table 5. Significantly enriched pathways in the GSEA of glandular tissues**

| Pathway name                                                          | Size | Enrichment score | Normalized enrichment score | NOM p-val | FDR q-val |
|-----------------------------------------------------------------------|------|------------------|-----------------------------|-----------|-----------|
| HALLMARK_INTERFERON_ALPHA_RESPONSE                                    | 95   | 0.872            | 1.952                       | <0.0001   | <0.0001   |
| HALLMARK_INTERFERON_GAMMA_RESPONSE                                    | 198  | 0.826            | 1.880                       | <0.0001   | <0.0001   |
| HALLMARK_ALLOGRAFT_REJECTION                                          | 195  | 0.784            | 1.778                       | <0.0001   | <0.0001   |
| REACTOME_INTERFERON_ALPHA_BETA_SIGNALING                              | 68   | 0.836            | 1.830                       | <0.0001   | <0.0001   |
| REACTOME_CHEMOKINE_RECEPTORS_BIND_CHEMOKINES                          | 48   | 0.819            | 1.791                       | <0.0001   | <0.0001   |
| HALLMARK_IL6_JAK_STAT3_SIGNALING                                      | 87   | 0.718            | 1.611                       | <0.0001   | <0.0001   |
| HALLMARK_INFLAMMATORY_RESPONSE                                        | 198  | 0.676            | 1.544                       | <0.0001   | 0.001     |
| REACTOME_PHOSPHORYLATION_OF_CD3_AND_TCR_ZETA_CHAINS                   | 21   | 0.872            | 1.755                       | <0.0001   | 0.001     |
| GO_RESPONSE_TO_INTERFERON_BETA                                        | 27   | 0.877            | 1.839                       | <0.0001   | 0.003     |
| GO_CD8_POSITIVE_ALPHA_BETA_T_CELL_ACTIVATION                          | 22   | 0.864            | 1.776                       | <0.0001   | 0.003     |
| GO_RESPONSE_TO_TYPE_I_INTERFERON                                      | 95   | 0.795            | 1.783                       | <0.0001   | 0.004     |
| GO_B_CELL_RECEPTOR_SIGNALING_PATHWAY                                  | 58   | 0.817            | 1.811                       | <0.0001   | 0.004     |
| GO_DENDRITIC_CELL_MIGRATION                                           | 28   | 0.827            | 1.735                       | <0.0001   | 0.004     |
| GO_POSITIVE_REGULATION_OF_MONOCYTE_CHEMOTAXIS                         | 18   | 0.866            | 1.728                       | <0.0001   | 0.004     |
| GO_POSITIVE_REGULATION_OF_ANTIGEN_RECEPTOR_MEDIATED_SIGNALING_PATHWAY | 21   | 0.842            | 1.739                       | <0.0001   | 0.004     |
| GO_NEGATIVE_REGULATION_OF_VIRAL_GENOME_REPLICATION                    | 55   | 0.786            | 1.730                       | <0.0001   | 0.004     |

|                                                                                    |     |       |       |         |       |
|------------------------------------------------------------------------------------|-----|-------|-------|---------|-------|
| GO_REGULATION_OF_B_CELL_RECEPTOR_SIGNALING_PATHWAY                                 | 27  | 0.829 | 1.743 | <0.0001 | 0.005 |
| REACTOME_INTERFERON_GAMMA_SIGNALING                                                | 91  | 0.756 | 1.694 | <0.0001 | 0.005 |
| GO_REGULATION_OF_MONOCYTE_CHEMOTAXIS                                               | 24  | 0.855 | 1.751 | <0.0001 | 0.005 |
| REACTOME_INTERLEUKIN_10_SIGNALING                                                  | 46  | 0.780 | 1.712 | <0.0001 | 0.005 |
| HALLMARK_COMPLEMENT                                                                | 199 | 0.647 | 1.473 | <0.0001 | 0.005 |
| REACTOME_TRANSLOCATION_OF_ZAP_70_TO_IMMUNOLOGICAL_SYNAPSE                          | 18  | 0.854 | 1.696 | <0.0001 | 0.005 |
| REACTOME_INTERFERON_SIGNALING                                                      | 199 | 0.742 | 1.683 | <0.0001 | 0.006 |
| GO_CELLULAR_RESPONSE_TO_INTERFERON_BETA                                            | 19  | 0.857 | 1.752 | <0.0001 | 0.006 |
| GO_REGULATION_OF_T_CELL_MEDIATED_CYTOTOXICITY                                      | 32  | 0.795 | 1.708 | <0.0001 | 0.006 |
| GO_ANTIGEN_PROCESSING_AND_PRESENTATION_OF_ENDOGENOUS_ANTIGEN                       | 22  | 0.827 | 1.707 | <0.0001 | 0.006 |
| GO_POSITIVE_REGULATION_OF_T_CELL_MEDIATED_IMMUNITY                                 | 48  | 0.778 | 1.705 | <0.0001 | 0.006 |
| GO_ALPHA_BETA_T_CELL_PROLIFERATION                                                 | 30  | 0.799 | 1.709 | <0.0001 | 0.006 |
| GO_MATURE_B_CELL_DIFFERENTIATION                                                   | 24  | 0.824 | 1.710 | <0.0001 | 0.007 |
| REACTOME_ANTIGEN_PRESENTATION:_FOLDING_ASSEMBLY_AND_PEPTIDE_LOADING_OF_CLASS_I_MHC | 25  | 0.812 | 1.674 | <0.0001 | 0.007 |
| GO_POSITIVE_REGULATION_OF_LEUKOCYTE_MEDIATED_CYTOTOXICITY                          | 48  | 0.781 | 1.710 | <0.0001 | 0.007 |
| REACTOME_GENERATION_OF_SECOND_MESSENGER_MOLECULES                                  | 31  | 0.787 | 1.666 | <0.0001 | 0.007 |
| HALLMARK_IL2_STAT5_SIGNALING                                                       | 195 | 0.624 | 1.426 | <0.0001 | 0.007 |

|                                                                      |     |       |       |         |       |
|----------------------------------------------------------------------|-----|-------|-------|---------|-------|
| HALLMARK_KRAS_SIGNALING_UP                                           | 194 | 0.629 | 1.427 | <0.0001 | 0.008 |
| GO_T_CELL_MEDIATED_CYTOTOXICITY                                      | 40  | 0.776 | 1.682 | <0.0001 | 0.009 |
| GO_POSITIVE_REGULATION_OF_MONONUCLEAR_CELL_MIGRATION                 | 23  | 0.830 | 1.690 | <0.0001 | 0.009 |
| GO_INTERFERON_ALPHA_PRODUCTION                                       | 30  | 0.797 | 1.683 | <0.0001 | 0.009 |
| GO_REGULATION_OF_B_CELL_PROLIFERATION                                | 61  | 0.759 | 1.685 | <0.0001 | 0.009 |
| HALLMARK_TNFA_SIGNALING_VIA_NFKB                                     | 198 | 0.625 | 1.428 | <0.0001 | 0.009 |
| GO_DEFENSE_RESPONSE_TO_VIRUS                                         | 230 | 0.735 | 1.685 | <0.0001 | 0.010 |
| HALLMARK_E2F_TARGETS                                                 | 193 | 0.612 | 1.400 | <0.0001 | 0.010 |
| GO_NEGATIVE_REGULATION_OF_LEUKOCYTE_MEDIATED_CYTOTOXICITY            | 18  | 0.830 | 1.670 | <0.0001 | 0.011 |
| GO_REGULATION_OF_T_CELL_MEDIATED_IMMUNITY                            | 69  | 0.753 | 1.671 | <0.0001 | 0.011 |
| HALLMARK_ANDROGEN_RESPONSE                                           | 95  | 0.616 | 1.385 | <0.0001 | 0.012 |
| GO_INTERFERON_GAMMA_MEDIATED_SIGNALING_PATHWAY                       | 87  | 0.745 | 1.664 | <0.0001 | 0.012 |
| GO_MONOCYTE_CHEMOTAXIS                                               | 62  | 0.750 | 1.656 | <0.0001 | 0.013 |
| GO_RESPONSE_TO_INTERFERON_ALPHA                                      | 20  | 0.828 | 1.664 | <0.0001 | 0.013 |
| GO_REGULATION_OF_ANTIGEN_RECEPTOR_MEDIATED_SIGNALING_PATHWAY         | 62  | 0.750 | 1.657 | <0.0001 | 0.013 |
| GO_ANTIGEN_PROCESSING_AND_PRESENTATION_OF_ENDOGENOUS_PEPTIDE_ANTIGEN | 15  | 0.857 | 1.666 | <0.0001 | 0.013 |
| GO_REGULATION_OF_ANTIGEN_PROCESSING_AND_PRESENTATION                 | 20  | 0.830 | 1.657 | <0.0001 | 0.013 |

|                                                                                   |     |       |       |         |       |
|-----------------------------------------------------------------------------------|-----|-------|-------|---------|-------|
| GO_LEUKOCYTE_ACTIVATION_INVOLVED_IN_INFLAMMATORY_RESPONSE                         | 45  | 0.760 | 1.660 | <0.0001 | 0.013 |
| GO_T_CELL_MEDIATED_IMMUNITY                                                       | 98  | 0.741 | 1.661 | <0.0001 | 0.013 |
| GO_REGULATION_OF_LEUKOCYTE_MEDIATED_CYTOTOXICITY                                  | 70  | 0.748 | 1.658 | <0.0001 | 0.014 |
| GO_POSITIVE_REGULATION_OF_CELL_KILLING                                            | 61  | 0.747 | 1.651 | <0.0001 | 0.014 |
| REACTOME_THE_ROLE_OF_NEF_IN_HIV_1_REPLICATION_AND_DISEASE_PATHOGENESIS            | 28  | 0.784 | 1.636 | 0.001   | 0.014 |
| REACTOME_IMMUNOREGULATORY_INTERACTIONS_BETWEEN_A_LYMPHOID_AND_A_NON_LYMPHOID_CELL | 124 | 0.724 | 1.638 | <0.0001 | 0.015 |
| GO_POSITIVE_REGULATION_OF_T_CELL_MEDIATED_CYTOTOXICITY                            | 25  | 0.799 | 1.648 | <0.0001 | 0.015 |
| GO_POSITIVE_REGULATION_OF_INTERFERON_GAMMA_PRODUCTION                             | 62  | 0.743 | 1.647 | <0.0001 | 0.015 |
| GO_MONONUCLEAR_CELL_MIGRATION                                                     | 84  | 0.733 | 1.646 | <0.0001 | 0.015 |
| GO_POSITIVE_REGULATION_OF_T_CELL_CYTOKINE_PRODUCTION                              | 19  | 0.814 | 1.633 | <0.0001 | 0.016 |
| GO_CHRONIC_INFLAMMATORY_RESPONSE                                                  | 19  | 0.812 | 1.633 | 0.001   | 0.016 |
| GO_LEUKOCYTE_MEDIATED_CYTOTOXICITY                                                | 102 | 0.727 | 1.634 | <0.0001 | 0.017 |
| GO_POSITIVE_REGULATION_OF_HUMORAL_IMMUNE_RESPONSE                                 | 16  | 0.830 | 1.627 | 0.001   | 0.017 |
| GO_ADAPTIVE_IMMUNE_RESPONSE                                                       | 397 | 0.708 | 1.634 | <0.0001 | 0.017 |
| HALLMARK_G2M_CHECKPOINT                                                           | 189 | 0.600 | 1.362 | <0.0001 | 0.017 |
| GO_LYMPHOCYTE_CHEMOTAXIS                                                          | 61  | 0.742 | 1.627 | <0.0001 | 0.017 |
| GO_B_CELL_PROLIFERATION                                                           | 95  | 0.724 | 1.638 | <0.0001 | 0.017 |

|                                                              |     |       |       |         |       |
|--------------------------------------------------------------|-----|-------|-------|---------|-------|
| GO_INTERFERON_GAMMA_SECRETION                                | 20  | 0.804 | 1.634 | 0.001   | 0.017 |
| GO_POSITIVE_REGULATION_OF_TYPE_2_IMMUNE_RESPONSE             | 16  | 0.830 | 1.627 | <0.0001 | 0.017 |
| GO_TUMOR_NECROSIS_FACTOR_BIOSYNTHETIC_PROCESS                | 30  | 0.771 | 1.635 | 0.001   | 0.017 |
| GO_REGULATION_OF_MONONUCLEAR_CELL_MIGRATION                  | 43  | 0.750 | 1.638 | <0.0001 | 0.017 |
| GO_ALPHA_BETA_T_CELL_ACTIVATION                              | 133 | 0.723 | 1.640 | <0.0001 | 0.017 |
| GO_POSITIVE_REGULATION_OF_LYMPHOCYTE_MEDIATED_IMMUNITY       | 96  | 0.728 | 1.627 | <0.0001 | 0.018 |
| GO_T_CELL_MIGRATION                                          | 64  | 0.732 | 1.636 | <0.0001 | 0.018 |
| GO_RESPONSE_TO_INTERFERON_GAMMA                              | 194 | 0.718 | 1.628 | <0.0001 | 0.018 |
| GO_NEGATIVE_REGULATION_OF_INNATE_IMMUNE_RESPONSE             | 57  | 0.734 | 1.618 | <0.0001 | 0.018 |
| GO_REGULATION_OF_DEFENSE_RESPONSE_TO_VIRUS_BY_VIRUS          | 30  | 0.766 | 1.619 | <0.0001 | 0.018 |
| GO_POSITIVE_REGULATION_OF_INTERLEUKIN_12_PRODUCTION          | 36  | 0.754 | 1.620 | 0.001   | 0.018 |
| GO_RESPONSE_TO_CHEMOKINE                                     | 95  | 0.724 | 1.617 | <0.0001 | 0.018 |
| GO_T_CELL_DIFFERENTIATION_INVOLVED_IN_IMMUNE_RESPONSE        | 68  | 0.729 | 1.619 | <0.0001 | 0.018 |
| GO_MATURE_B_CELL_DIFFERENTIATION_INVOLVED_IN_IMMUNE_RESPONSE | 18  | 0.801 | 1.615 | <0.0001 | 0.019 |
| GO_ALPHA_BETA_T_CELL_DIFFERENTIATION                         | 100 | 0.720 | 1.621 | <0.0001 | 0.019 |
| GO_NEGATIVE_REGULATION_OF_CELL_KILLING                       | 22  | 0.793 | 1.615 | <0.0001 | 0.019 |
| GO_GLIAL_CELL_ACTIVATION                                     | 53  | 0.738 | 1.620 | <0.0001 | 0.019 |

|                                                                                                                              |     |       |       |         |       |
|------------------------------------------------------------------------------------------------------------------------------|-----|-------|-------|---------|-------|
| GO_NEGATIVE_REGULATION_OF_T_CELL_MEDIATED_IMMUNITY                                                                           | 19  | 0.794 | 1.614 | <0.0001 | 0.019 |
| GO_ADAPTIVE_IMMUNE_RESPONSE_BASED_ON_SOMATIC_RECOMBINATION_OF_IMMUNE_RECEPTORS_BUILT_FROM_IMMUNOGLOBULIN_SUPERFAMILY_DOMAINS | 245 | 0.705 | 1.613 | <0.0001 | 0.019 |
| GO_NEGATIVE_REGULATION_OF_TYPE_I_INTERFERON_PRODUCTION                                                                       | 43  | 0.738 | 1.610 | <0.0001 | 0.020 |
| GO_RESPONSE_TO_VIRUS                                                                                                         | 310 | 0.703 | 1.610 | <0.0001 | 0.020 |
| GO_B_CELL_ACTIVATION                                                                                                         | 238 | 0.700 | 1.607 | <0.0001 | 0.020 |
| GO_T_CELL_CHEMOTAXIS                                                                                                         | 27  | 0.781 | 1.608 | <0.0001 | 0.020 |
| GO_POSITIVE_REGULATION_OF_INTERFERON_ALPHA_PRODUCTION                                                                        | 22  | 0.790 | 1.608 | 0.001   | 0.020 |
| GO_NATURAL_KILLER_CELL_MEDIATED_IMMUNITY                                                                                     | 61  | 0.720 | 1.605 | <0.0001 | 0.020 |
| GO_POSITIVE_REGULATION_OF_CYTOKINE_PRODUCTION_INVOLVED_IN_IMMUNE_RESPONSE                                                    | 55  | 0.733 | 1.604 | <0.0001 | 0.020 |
| GO_POSITIVE_REGULATION_OF_B_CELL_PROLIFERATION                                                                               | 41  | 0.737 | 1.604 | <0.0001 | 0.020 |
| GO_REGULATION_OF_LIPOPOLYSACCHARIDE_MEDIATED_SIGNALING_PATHWAY                                                               | 25  | 0.757 | 1.606 | <0.0001 | 0.020 |
| GO_LIPOPOLYSACCHARIDE_MEDIATED_SIGNALING_PATHWAY                                                                             | 58  | 0.723 | 1.606 | <0.0001 | 0.020 |
| GO_POSITIVE_REGULATION_OF_INTERLEUKIN_1_PRODUCTION                                                                           | 55  | 0.732 | 1.601 | <0.0001 | 0.021 |
| GO_T_HELPER_1_TYPE_IMMUNE_RESPONSE                                                                                           | 42  | 0.740 | 1.602 | <0.0001 | 0.021 |
| REACTOME_PD_1_SIGNALING                                                                                                      | 22  | 0.787 | 1.618 | 0.002   | 0.021 |
| GO_MYELOID_DENDRITIC_CELL_ACTIVATION                                                                                         | 28  | 0.758 | 1.592 | 0.001   | 0.021 |
| GO_POSITIVE_REGULATION_OF_B_CELL_MEDIATED_IMMUNITY                                                                           | 32  | 0.749 | 1.592 | <0.0001 | 0.021 |

|                                                                                 |     |       |       |         |       |
|---------------------------------------------------------------------------------|-----|-------|-------|---------|-------|
| GO_REGULATION_OF_T_HELPER_1_TYPE_IMMUNE_RESPONSE                                | 26  | 0.769 | 1.599 | <0.0001 | 0.022 |
| GO_NEGATIVE_REGULATION_OF_LEUKOCYTE_APOPTOTIC_PROCESS                           | 48  | 0.730 | 1.591 | <0.0001 | 0.022 |
| GO_POSITIVE_REGULATION_OF_RESPONSE_TO_CYTOKINE_STIMULUS                         | 55  | 0.720 | 1.592 | <0.0001 | 0.022 |
| GO_REGULATION_OF_INFLAMMATORY_RESPONSE_TO_ANTIGENIC_STIMULUS                    | 23  | 0.779 | 1.596 | 0.001   | 0.022 |
| GO_POSITIVE_T_CELL_SELECTION                                                    | 34  | 0.748 | 1.597 | <0.0001 | 0.022 |
| GO_LYMPHOCYTE_MEDIATED_IMMUNITY                                                 | 242 | 0.700 | 1.595 | <0.0001 | 0.022 |
| GO_REGULATION_OF_DEFENSE_RESPONSE_TO_VIRUS_BY_HOST                              | 33  | 0.750 | 1.596 | <0.0001 | 0.022 |
| GO_INTERFERON_GAMMA_PRODUCTION                                                  | 106 | 0.704 | 1.592 | <0.0001 | 0.022 |
| GO_REGULATION_OF_B_CELL_ACTIVATION                                              | 116 | 0.708 | 1.597 | <0.0001 | 0.022 |
| GO_NATURAL_KILLER_CELL_ACTIVATION                                               | 82  | 0.707 | 1.598 | <0.0001 | 0.022 |
| GO_POSITIVE_REGULATION_OF_TUMOR_NECROSIS_FACTOR_SUPERFAMILY_CYTOKINE_PRODUCTION | 85  | 0.710 | 1.592 | <0.0001 | 0.022 |
| GO_CD4_POSITIVE_ALPHA_BETA_T_CELL_DIFFERENTIATION                               | 73  | 0.711 | 1.589 | <0.0001 | 0.022 |
| GO_POSITIVE_REGULATION_OF_PROTEIN_AUTOPHOSPHORYLATION                           | 25  | 0.766 | 1.593 | <0.0001 | 0.022 |
| GO_B_CELL_HOMEOSTASIS                                                           | 28  | 0.759 | 1.593 | 0.001   | 0.022 |
| GO_THYMIC_T_CELL_SELECTION                                                      | 21  | 0.778 | 1.593 | 0.002   | 0.022 |
| GO_NEGATIVE_REGULATION_OF_MACROPHAGE_ACTIVATION                                 | 15  | 0.815 | 1.586 | 0.003   | 0.023 |
| GO_INTERLEUKIN_8_BIOSYNTHETIC_PROCESS                                           | 17  | 0.803 | 1.585 | 0.001   | 0.024 |

|                                                                 |     |       |       |         |       |
|-----------------------------------------------------------------|-----|-------|-------|---------|-------|
| GO_POSITIVE_REGULATION_OF_ADAPTIVE_IMMUNE_RESPONSE              | 99  | 0.710 | 1.583 | <0.0001 | 0.024 |
| GO_REGULATION_OF_DEFENSE_RESPONSE_TO_VIRUS                      | 65  | 0.716 | 1.585 | <0.0001 | 0.024 |
| GO_NEGATIVE_REGULATION_OF_LEUKOCYTE_MEDIATED_IMMUNITY           | 49  | 0.729 | 1.583 | <0.0001 | 0.024 |
| GO_NEUROINFLAMMATORY_RESPONSE                                   | 66  | 0.712 | 1.582 | <0.0001 | 0.024 |
| GO_TOLERANCE_INDUCTION                                          | 22  | 0.775 | 1.584 | 0.001   | 0.024 |
| HALLMARK_APOPTOSIS                                              | 159 | 0.586 | 1.335 | 0.002   | 0.024 |
| GO_GRANULOCYTE_MIGRATION                                        | 135 | 0.700 | 1.579 | <0.0001 | 0.024 |
| GO_NEGATIVE_REGULATION_OF_LEUKOCYTE_CHEMOTAXIS                  | 16  | 0.807 | 1.581 | 0.003   | 0.024 |
| GO_NEUTROPHIL_MIGRATION                                         | 114 | 0.705 | 1.580 | <0.0001 | 0.024 |
| GO_T_CELL_DIFFERENTIATION                                       | 236 | 0.690 | 1.579 | <0.0001 | 0.024 |
| GO_POSITIVE_REGULATION_OF_T_HELPER_1_TYPE_IMMUNE_RESPONSE       | 19  | 0.792 | 1.580 | 0.003   | 0.024 |
| GO_NEGATIVE_REGULATION_OF_NATURAL_KILLER_CELL_MEDIATED_IMMUNITY | 15  | 0.803 | 1.578 | 0.003   | 0.024 |
| GO_POSITIVE_REGULATION_OF_LEUKOCYTE_MEDIATED_IMMUNITY           | 124 | 0.702 | 1.581 | <0.0001 | 0.024 |
| GO_REGULATION_OF_VIRAL_GENOME_REPLICATION                       | 90  | 0.708 | 1.578 | <0.0001 | 0.024 |
| GO_POSITIVE_REGULATION_OF_NATURAL_KILLER_CELL_MEDIATED_IMMUNITY | 27  | 0.749 | 1.567 | <0.0001 | 0.025 |
| GO_POSITIVE_REGULATION_OF_T_CELL_PROLIFERATION                  | 94  | 0.702 | 1.570 | <0.0001 | 0.025 |
| GO_POSITIVE_REGULATION_OF_LYMPHOCYTE_DIFFERENTIATION            | 94  | 0.706 | 1.574 | <0.0001 | 0.025 |



|                                                                     |     |       |       |         |       |
|---------------------------------------------------------------------|-----|-------|-------|---------|-------|
| GO_LYMPHOCYTE_MIGRATION                                             | 109 | 0.699 | 1.573 | <0.0001 | 0.025 |
| GO_REGULATION_OF_SYNCYTIUM_FORMATION_BY_PLASMA_MEMBRANE_FUSION      | 27  | 0.749 | 1.573 | 0.002   | 0.025 |
| GO_REGULATION_OF_T_CELL_CYTOKINE_PRODUCTION                         | 31  | 0.745 | 1.568 | <0.0001 | 0.025 |
| GO_REGULATION_OF_T_CELL_CHEMOTAXIS                                  | 17  | 0.789 | 1.574 | 0.001   | 0.025 |
| GO_REGULATION_OF_ADAPTIVE_IMMUNE_RESPONSE                           | 154 | 0.693 | 1.572 | <0.0001 | 0.025 |
| GO_POSITIVE_REGULATION_OF_LEUKOCYTE_CELL_CELL_ADHESION              | 213 | 0.687 | 1.571 | <0.0001 | 0.025 |
| GO_REGULATION_OF_LEUKOCYTE_MEDIATED_IMMUNITY                        | 190 | 0.692 | 1.571 | <0.0001 | 0.025 |
| GO_REGULATION_OF_LYMPHOCYTE_CHEMOTAXIS                              | 26  | 0.756 | 1.575 | <0.0001 | 0.025 |
| REACTOME_DAP12_SIGNALING                                            | 29  | 0.760 | 1.607 | <0.0001 | 0.025 |
| GO_LYMPHOCYTE_DIFFERENTIATION                                       | 348 | 0.686 | 1.571 | <0.0001 | 0.025 |
| GO_POSITIVE_REGULATION_OF_T_CELL_MIGRATION                          | 30  | 0.751 | 1.576 | 0.001   | 0.025 |
| GO_POSITIVE_REGULATION_OF_ALPHA_BETA_T_CELL_PROLIFERATION           | 19  | 0.785 | 1.568 | 0.002   | 0.025 |
| GO_POSITIVE_REGULATION_OF_NATURAL_KILLER_CELL_MEDIATED_CYTOTOXICITY | 22  | 0.767 | 1.572 | 0.001   | 0.025 |
| GO_B_CELL_DIFFERENTIATION                                           | 129 | 0.697 | 1.575 | <0.0001 | 0.025 |
| GO_NEGATIVE_REGULATION_OF_LYMPHOCYTE_MEDIATED_IMMUNITY              | 39  | 0.724 | 1.569 | 0.001   | 0.025 |
| GO_IMMUNOGLOBULIN_PRODUCTION                                        | 102 | 0.698 | 1.569 | <0.0001 | 0.025 |
| GO_TUMOR_NECROSIS_FACTOR_SUPERFAMILY_CYTOKINE_PRODUCTION            | 150 | 0.688 | 1.569 | <0.0001 | 0.025 |

|                                                                        |     |       |       |         |       |
|------------------------------------------------------------------------|-----|-------|-------|---------|-------|
| GO_T_CELL_SELECTION                                                    | 47  | 0.723 | 1.575 | 0.001   | 0.025 |
| GO_POSITIVE_REGULATION_OF_TUMOR_NECROSIS_FACTOR_BIOSYNTHETIC_PROCESS   | 20  | 0.777 | 1.568 | <0.0001 | 0.025 |
| GO_POSITIVE_REGULATION_OF_GRANULOCYTE_CHEMOTAXIS                       | 25  | 0.754 | 1.566 | 0.001   | 0.025 |
| GO_REGULATION_OF_CELL_KILLING                                          | 91  | 0.698 | 1.568 | <0.0001 | 0.025 |
| GO_NEGATIVE_REGULATION_OF_TYPE_I_INTERFERON_MEDIATED_SIGNALING_PATHWAY | 16  | 0.797 | 1.564 | 0.002   | 0.026 |
| GO_REGULATION_OF_LYMPHOCYTE_MEDIATED_IMMUNITY                          | 140 | 0.693 | 1.564 | <0.0001 | 0.026 |
| GO_NEGATIVE_REGULATION_OF_INTERLEUKIN_6_PRODUCTION                     | 42  | 0.720 | 1.563 | 0.001   | 0.026 |
| GO_INTERLEUKIN_8_PRODUCTION                                            | 78  | 0.701 | 1.563 | <0.0001 | 0.026 |
| GO_POSITIVE_REGULATION_OF_PHOSPHOPROTEIN_PHOSPHATASE_ACTIVITY          | 20  | 0.779 | 1.561 | 0.003   | 0.027 |
| GO_NEGATIVE_REGULATION_OF_MYELOID_CELL_APOPTOTIC_PROCESS               | 15  | 0.788 | 1.548 | 0.004   | 0.027 |
| GO_REGULATION_OF_NATURAL_KILLER_CELL_ACTIVATION                        | 34  | 0.724 | 1.554 | 0.001   | 0.027 |
| GO_LEUKOCYTE_CHEMOTAXIS                                                | 211 | 0.680 | 1.555 | <0.0001 | 0.027 |
| GO_POSITIVE_REGULATION_OF_PHAGOCYTOSIS                                 | 65  | 0.695 | 1.548 | <0.0001 | 0.027 |
| GO_POSITIVE_REGULATION_OF_PHOSPHATASE_ACTIVITY                         | 33  | 0.732 | 1.551 | 0.001   | 0.027 |
| GO_TOLL_LIKE_RECEPTOR_9_SIGNALING_PATHWAY                              | 23  | 0.754 | 1.547 | 0.003   | 0.027 |
| GO_REGULATION_OF_LEUKOCYTE_CHEMOTAXIS                                  | 107 | 0.690 | 1.560 | <0.0001 | 0.027 |
| GO_POSITIVE_REGULATION_OF_CYTOKINE_BIOSYNTHETIC_PROCESS                | 67  | 0.700 | 1.554 | <0.0001 | 0.027 |

|                                                                           |     |       |       |         |       |
|---------------------------------------------------------------------------|-----|-------|-------|---------|-------|
| GO_POSITIVE_REGULATION_OF_ALPHA_BETA_T_CELL_ACTIVATION                    | 61  | 0.707 | 1.557 | <0.0001 | 0.027 |
| GO_ANTIGEN_RECEPTOR_MEDIATED_SIGNALING_PATHWAY                            | 235 | 0.683 | 1.558 | <0.0001 | 0.027 |
| GO_POSITIVE_REGULATION_OF_NEUTROPHIL_MIGRATION                            | 28  | 0.738 | 1.548 | 0.002   | 0.027 |
| GO_INTERLEUKIN_6_SECRETION                                                | 45  | 0.711 | 1.558 | 0.001   | 0.027 |
| GO_NEGATIVE_REGULATION_OF_VIRAL_LIFE_CYCLE                                | 77  | 0.702 | 1.555 | <0.0001 | 0.027 |
| GO_ANTIGEN_PROCESSING_AND_PRESENTATION_VIA_MHC_CLASS_II                   | 16  | 0.791 | 1.549 | 0.002   | 0.027 |
| GO_DEOXYRIBONUCLEOSIDE_TRIPHOSPHATE_METABOLIC_PROCESS                     | 17  | 0.776 | 1.557 | 0.010   | 0.027 |
| GO_POSITIVE_REGULATION_OF_LEUKOCYTE_PROLIFERATION                         | 135 | 0.688 | 1.556 | <0.0001 | 0.027 |
| GO_POSITIVE_REGULATION_OF_LEUKOCYTE_CHEMOTAXIS                            | 84  | 0.698 | 1.556 | <0.0001 | 0.027 |
| GO_ANTIGEN_PROCESSING_AND_PRESENTATION_OF_PEPTIDE_ANTIGEN_VIA_MHC_CLASS_I | 96  | 0.696 | 1.559 | <0.0001 | 0.027 |
| GO_POSITIVE_REGULATION_OF_NATURAL_KILLER_CELL_ACTIVATION                  | 20  | 0.772 | 1.549 | 0.002   | 0.027 |
| GO_POSITIVE_REGULATION_OF_TISSUE_REMODELING                               | 33  | 0.719 | 1.547 | 0.001   | 0.027 |
| GO_REGULATION_OF_CYTOKINE_PRODUCTION_INVOLVED_IN_IMMUNE_RESPONSE          | 85  | 0.699 | 1.558 | <0.0001 | 0.027 |
| GO_ANTIGEN_PROCESSING_AND_PRESENTATION                                    | 224 | 0.680 | 1.551 | <0.0001 | 0.027 |
| GO_MYELOID_LEUKOCYTE_MIGRATION                                            | 198 | 0.680 | 1.551 | <0.0001 | 0.027 |
| GO_POSITIVE_REGULATION_OF_INTERLEUKIN_8_PRODUCTION                        | 49  | 0.704 | 1.546 | 0.001   | 0.027 |
| GO_NEGATIVE_REGULATION_OF_CYTOKINE_SECRETION                              | 65  | 0.702 | 1.553 | <0.0001 | 0.027 |

|                                                               |     |       |       |         |       |
|---------------------------------------------------------------|-----|-------|-------|---------|-------|
| GO_MACROPHAGE_ACTIVATION                                      | 90  | 0.690 | 1.559 | <0.0001 | 0.027 |
| GO_FC_RECEPTOR_MEDIATED_STIMULATORY_SIGNALING_PATHWAY         | 82  | 0.696 | 1.549 | <0.0001 | 0.027 |
| GO_REGULATION_OF_NATURAL_KILLER_CELL_MEDIATED_IMMUNITY        | 41  | 0.717 | 1.547 | <0.0001 | 0.027 |
| GO_REGULATION_OF_T_CELL_DIFFERENTIATION                       | 137 | 0.691 | 1.556 | <0.0001 | 0.027 |
| GO_POSITIVE_REGULATION_OF_INTERLEUKIN_1_SECRETION             | 36  | 0.721 | 1.559 | <0.0001 | 0.027 |
| GO_POSITIVE_REGULATION_OF_IMMUNE_EFFECTOR_PROCESS             | 201 | 0.678 | 1.550 | <0.0001 | 0.027 |
| GO_REGULATION_OF_NEUROINFLAMMATORY_RESPONSE                   | 32  | 0.734 | 1.551 | 0.002   | 0.028 |
| GO_REGULATION_OF_LEUKOCYTE_APOPTOTIC_PROCESS                  | 82  | 0.696 | 1.551 | <0.0001 | 0.028 |
| GO_INTERLEUKIN_12_PRODUCTION                                  | 57  | 0.708 | 1.553 | <0.0001 | 0.028 |
| GO_REGULATION_OF_TYPE_1_INTERFERON_MEDIATED_SIGNALING_PATHWAY | 36  | 0.717 | 1.549 | 0.003   | 0.028 |
| GO_REGULATION_OF_ALPHA_BETA_T_CELL_ACTIVATION                 | 89  | 0.694 | 1.549 | <0.0001 | 0.028 |
| GO_REGULATORY_T_CELL_DIFFERENTIATION                          | 31  | 0.732 | 1.552 | <0.0001 | 0.028 |
| GO_ACUTE_INFLAMMATORY_RESPONSE_TO_ANTIGENIC_STIMULUS          | 21  | 0.770 | 1.552 | 0.005   | 0.028 |
| GO_BONE_CELL_DEVELOPMENT                                      | 35  | 0.719 | 1.552 | <0.0001 | 0.028 |
| GO_INTERLEUKIN_1_BETA_PRODUCTION                              | 87  | 0.687 | 1.545 | <0.0001 | 0.028 |
| GO_NEGATIVE_REGULATION_OF_B_CELL_ACTIVATION                   | 32  | 0.731 | 1.544 | 0.002   | 0.028 |
| GO_PRODUCTION_OF_MOLECULAR_MEDIATOR_OF_IMMUNE_RESPONSE        | 196 | 0.678 | 1.545 | <0.0001 | 0.028 |

|                                                                               |     |       |       |         |       |
|-------------------------------------------------------------------------------|-----|-------|-------|---------|-------|
| GO_REGULATION_OF_CD4_POSITIVE_ALPHA_BETA_T_CELL_DIFFERENTIATION               | 47  | 0.705 | 1.543 | <0.0001 | 0.028 |
| GO_POSITIVE_REGULATION_OF_CD4_POSITIVE_ALPHA_BETA_T_CELL_DIFFERENTIATION      | 30  | 0.731 | 1.544 | 0.002   | 0.028 |
| GO_POSITIVE_REGULATION_OF_LEUKOCYTE_ADHESION_TO_VASCULAR_ENDOTHELIAL_CELL     | 15  | 0.784 | 1.542 | 0.008   | 0.029 |
| GO_SOMATIC_DIVERSIFICATION_OF_IMMUNE_RECEPTORS                                | 66  | 0.690 | 1.540 | <0.0001 | 0.029 |
| GO_POSITIVE_REGULATION_OF_LEUKOCYTE_DIFFERENTIATION                           | 146 | 0.684 | 1.542 | <0.0001 | 0.029 |
| GO_POSITIVE_REGULATION_OF_B_CELL_ACTIVATION                                   | 72  | 0.692 | 1.540 | <0.0001 | 0.029 |
| GO_B_CELL_ACTIVATION_INVOLVED_IN_IMMUNE_RESPONSE                              | 69  | 0.700 | 1.542 | <0.0001 | 0.029 |
| GO_REGULATION_OF_LYMPHOCYTE_DIFFERENTIATION                                   | 168 | 0.674 | 1.540 | <0.0001 | 0.029 |
| GO_ANTIGEN_PROCESSING_AND_PRESENTATION_OF_PEPTIDE_ANTIGEN                     | 187 | 0.676 | 1.540 | <0.0001 | 0.029 |
| GO_CHEMOKINE_BIOSYNTHETIC_PROCESS                                             | 16  | 0.775 | 1.537 | 0.003   | 0.029 |
| GO_DENDRITIC_CELL_DIFFERENTIATION                                             | 41  | 0.709 | 1.537 | 0.001   | 0.029 |
| GO_INTERLEUKIN_8_SECRETION                                                    | 30  | 0.730 | 1.540 | <0.0001 | 0.029 |
| GO_POSITIVE_REGULATION_OF_ACUTE_INFLAMMATORY_RESPONSE                         | 29  | 0.734 | 1.540 | <0.0001 | 0.029 |
| REACTOME_NEGATIVE_REGULATORS_OF_DDX58_IFIH1_SIGNALING                         | 34  | 0.747 | 1.595 | 0.001   | 0.029 |
| GO GRANULOCYTE MACROPHAGE COLONY STIMULATING FACTOR PRODUCTION                | 16  | 0.780 | 1.537 | 0.006   | 0.029 |
| GO_INTERLEUKIN_10_PRODUCTION                                                  | 51  | 0.692 | 1.537 | <0.0001 | 0.029 |
| GO_POSITIVE_REGULATION_OF_PRODUCTION_OF_MOLECULAR_MEDIATOR_OF_IMMUNE_RESPONSE | 92  | 0.687 | 1.538 | <0.0001 | 0.029 |

|                                                                                     |     |       |       |         |       |
|-------------------------------------------------------------------------------------|-----|-------|-------|---------|-------|
| GO_ANTIGEN_PROCESSING_AND_PRESENTATION_OF_EXOGENOUS_PEPTIDE_ANTIGEN_VIA_MHC_CLASS_I | 75  | 0.694 | 1.537 | <0.0001 | 0.029 |
| GO_NEGATIVE_REGULATION_OF_VIRAL_PROCESS                                             | 93  | 0.691 | 1.538 | <0.0001 | 0.029 |
| GO_REGULATION_OF_MYOBLAST_FUSION                                                    | 20  | 0.763 | 1.537 | 0.003   | 0.030 |
| GO_NEGATIVE_REGULATION_OF_B_CELL_PROLIFERATION                                      | 16  | 0.790 | 1.538 | 0.002   | 0.030 |
| GO_POSITIVE_REGULATION_OF_CD4_POSITIVE_ALPHA_BETA_T_CELL_ACTIVATION                 | 36  | 0.712 | 1.536 | 0.001   | 0.030 |
| GO_POSITIVE_REGULATION_OF_T_HELPER_CELL_DIFFERENTIATION                             | 22  | 0.749 | 1.536 | 0.002   | 0.030 |
| GO_B_CELL_MEDIATED_IMMUNITY                                                         | 113 | 0.682 | 1.534 | <0.0001 | 0.030 |
| GO_REGULATION_OF_MYELOID_LEUKOCYTE_MEDIATED_IMMUNITY                                | 52  | 0.701 | 1.533 | <0.0001 | 0.030 |
| GO_POSITIVE_REGULATION_OF_LYMPHOCYTE_MIGRATION                                      | 37  | 0.716 | 1.532 | 0.002   | 0.031 |
| GO_REGULATION_OF_T_CELL_RECEPTOR_SIGNALING_PATHWAY                                  | 38  | 0.708 | 1.531 | 0.001   | 0.032 |
| GO_NEGATIVE_REGULATION_OF_REGULATED_SECRETORY_PATHWAY                               | 22  | 0.737 | 1.530 | 0.006   | 0.032 |
| GO_CELLULAR_EXTRAVASATION                                                           | 62  | 0.683 | 1.530 | <0.0001 | 0.032 |
| GO_POSITIVE_REGULATION_OF_HEMOPOIESIS                                               | 183 | 0.671 | 1.530 | <0.0001 | 0.032 |
| GO_REGULATION_OF_IMMUNE_EFFECTOR_PROCESS                                            | 374 | 0.663 | 1.530 | <0.0001 | 0.032 |
| HALLMARK_MTORC1_SIGNALING                                                           | 194 | 0.577 | 1.314 | <0.0001 | 0.032 |
| GO_POSITIVE_REGULATION_OF_CELLULAR_EXTRAVASATION                                    | 16  | 0.775 | 1.526 | 0.003   | 0.033 |
| GO_REGULATION_OF_TYPE_2_IMMUNE_RESPONSE                                             | 31  | 0.719 | 1.526 | 0.001   | 0.033 |

|                                                                      |     |       |       |         |       |
|----------------------------------------------------------------------|-----|-------|-------|---------|-------|
| GO_VIRAL_GENOME_REPLICATION                                          | 116 | 0.679 | 1.527 | <0.0001 | 0.033 |
| GO_CELL_KILLING                                                      | 160 | 0.670 | 1.527 | <0.0001 | 0.033 |
| GO_REGULATION_OF_PRODUCTION_OF_MOLECULAR_MEDIATOR_OF_IMMUNE_RESPONSE | 136 | 0.675 | 1.526 | <0.0001 | 0.033 |
| GO_CYTOKINE_PRODUCTION_INVOLVED_IN_IMMUNE_RESPONSE                   | 103 | 0.680 | 1.525 | <0.0001 | 0.033 |
| GO_NEGATIVE_REGULATION_OF_ADAPTIVE_IMMUNE_RESPONSE                   | 46  | 0.705 | 1.525 | <0.0001 | 0.033 |
| GO_POSITIVE_REGULATION_OF_INTERFERON_BETA_PRODUCTION                 | 30  | 0.721 | 1.526 | 0.001   | 0.033 |
| GO_CELLULAR_DEFENSE_RESPONSE                                         | 52  | 0.698 | 1.526 | <0.0001 | 0.033 |
| GO_CYTOKINE_SECRETION                                                | 225 | 0.670 | 1.526 | <0.0001 | 0.033 |
| GO_INFLAMMATORY_CELL_APOPTOTIC_PROCESS                               | 20  | 0.756 | 1.524 | 0.006   | 0.033 |
| GO_PROTEIN_LOCALIZATION_TO_CHROMATIN                                 | 21  | 0.755 | 1.523 | 0.007   | 0.033 |
| GO_REGULATION_OF_HUMORAL_IMMUNE_RESPONSE                             | 69  | 0.683 | 1.523 | <0.0001 | 0.033 |
| GO_LEUKOCYTE_PROLIFERATION                                           | 291 | 0.666 | 1.523 | <0.0001 | 0.033 |
| GO_POSITIVE_REGULATION_OF_CELL_CELL_ADHESION                         | 251 | 0.670 | 1.523 | <0.0001 | 0.033 |
| GO_CD4_POSITIVE_ALPHA_BETA_T_CELL_ACTIVATION                         | 88  | 0.682 | 1.524 | <0.0001 | 0.034 |
| GO_REGULATION_OF_ALPHA_BETA_T_CELL_DIFFERENTIATION                   | 63  | 0.688 | 1.524 | <0.0001 | 0.034 |
| GO_POSITIVE_REGULATION_OF_ALPHA_BETA_T_CELL_DIFFERENTIATION          | 47  | 0.697 | 1.522 | <0.0001 | 0.034 |
| GO_POSITIVE_REGULATION_OF_INTERLEUKIN_10_PRODUCTION                  | 33  | 0.716 | 1.522 | 0.003   | 0.034 |

|                                                                                           |     |       |       |         |       |
|-------------------------------------------------------------------------------------------|-----|-------|-------|---------|-------|
| GO_REGULATION_OF_B_CELL_DIFFERENTIATION                                                   | 29  | 0.719 | 1.521 | 0.001   | 0.034 |
| GO_EOSINOPHIL_MIGRATION                                                                   | 25  | 0.732 | 1.521 | 0.006   | 0.034 |
| GO_LYMPHOCYTE_ACTIVATION_INVOLVED_IN_IMMUNE_RESPONSE                                      | 176 | 0.669 | 1.521 | <0.0001 | 0.034 |
| GO_POSITIVE_REGULATION_OF_CYTOKINE_SECRETION                                              | 133 | 0.672 | 1.520 | <0.0001 | 0.034 |
| GO_NEGATIVE_REGULATION_OF_LYMPHOCYTE_APOPTOTIC_PROCESS                                    | 31  | 0.716 | 1.519 | 0.002   | 0.035 |
| GO_REGULATION_OF_CD4_POSITIVE_ALPHA_BETA_T_CELL_ACTIVATION                                | 58  | 0.689 | 1.518 | <0.0001 | 0.035 |
| REACTOME_ANTIGEN_ACTIVATES_B_CELL_RECEPTOR_BCR_LEADING_TO_GENERATION_OF_SECOND_MESSENGERS | 29  | 0.760 | 1.584 | <0.0001 | 0.035 |
| GO_REGULATION_OF_LEUKOCYTE_PROLIFERATION                                                  | 215 | 0.665 | 1.517 | <0.0001 | 0.036 |
| GO_NEGATIVE_REGULATION_OF_T_CELL_APOPTOTIC_PROCESS                                        | 19  | 0.759 | 1.516 | 0.003   | 0.036 |
| REACTOME_ANTIGEN_PROCESSING_CROSS_PRESENTATION                                            | 97  | 0.705 | 1.580 | <0.0001 | 0.036 |
| GO_REGULATION_OF_LYMPHOCYTE_APOPTOTIC_PROCESS                                             | 54  | 0.695 | 1.516 | <0.0001 | 0.036 |
| GO_IMMUNE_RESPONSE_REGULATING_CELL_SURFACE_RECEPTOR_SIGNALING_PATHWAY                     | 382 | 0.661 | 1.515 | <0.0001 | 0.037 |
| GO_INTERFERON_BETA_PRODUCTION                                                             | 49  | 0.690 | 1.513 | 0.001   | 0.038 |
| GO_T_CELL_ACTIVATION_INVOLVED_IN_IMMUNE_RESPONSE                                          | 106 | 0.673 | 1.513 | <0.0001 | 0.038 |
| GO_NEGATIVE_REGULATION_OF_MULTI_ORGANISM_PROCESS                                          | 208 | 0.665 | 1.512 | <0.0001 | 0.038 |
| GO_NATURAL_KILLER_CELL_DIFFERENTIATION                                                    | 22  | 0.737 | 1.511 | 0.004   | 0.038 |
| REACTOME_GPVI_MEDIATED_ACTIVATION_CASCADE                                                 | 34  | 0.730 | 1.574 | <0.0001 | 0.039 |



|                                                                                                 |     |       |       |         |       |
|-------------------------------------------------------------------------------------------------|-----|-------|-------|---------|-------|
| GO_INFLAMMATORY_RESPONSE_TO_ANTIGENIC_STIMULUS                                                  | 47  | 0.686 | 1.509 | 0.001   | 0.039 |
| GO_POSITIVE_REGULATION_OF_DEFENSE_RESPONSE_TO_VIRUS_BY_HOST                                     | 23  | 0.732 | 1.510 | 0.005   | 0.039 |
| GO_INTERLEUKIN_6_BIOSYNTHETIC_PROCESS                                                           | 24  | 0.725 | 1.509 | 0.004   | 0.039 |
| GO_REGULATION_OF_B_CELL_APOPTOTIC_PROCESS                                                       | 19  | 0.747 | 1.509 | 0.009   | 0.039 |
| GO_CYTOPLASMIC_MRNA_PROCESSING_BODY_ASSEMBLY                                                    | 19  | 0.749 | 1.507 | 0.009   | 0.040 |
| GO_SOMATIC_DIVERSIFICATION_OF_IMMUNE_RECEPTORS_VIA_GERMLINE_RECOMBINATION_WITHIN_A_SINGLE_LOCUS | 58  | 0.682 | 1.506 | <0.0001 | 0.041 |
| GO_TYPE_2_IMMUNE_RESPONSE                                                                       | 38  | 0.703 | 1.506 | <0.0001 | 0.041 |
| GO_POSITIVE_REGULATION_OF_CELL_ACTIVATION                                                       | 313 | 0.660 | 1.506 | <0.0001 | 0.041 |
| GO_REGULATION_OF_RESPONSE_TO_BIOTIC_STIMULUS                                                    | 496 | 0.653 | 1.506 | <0.0001 | 0.041 |
| GO_REGULATION_OF_RESPONSE_TO_CYTOKINE_STIMULUS                                                  | 167 | 0.661 | 1.505 | <0.0001 | 0.041 |
| GO_POSITIVE_REGULATION_OF_MYELOID_LEUKOCYTE_MEDIATED_IMMUNITY                                   | 30  | 0.707 | 1.505 | 0.004   | 0.041 |
| GO_T_CELL_ACTIVATION                                                                            | 455 | 0.654 | 1.504 | <0.0001 | 0.041 |
| GO_POSITIVE_REGULATION_OF_RELEASE_OF_SEQUESTERED_CALCIIUM_ION_INTO_CYTOSOL                      | 40  | 0.699 | 1.504 | 0.002   | 0.041 |
| GO_NEGATIVE_REGULATION_OF_ANTIGEN_RECEPTOR_MEDIATED_SIGNALING_PATHWAY                           | 28  | 0.721 | 1.504 | 0.002   | 0.041 |
| GO_REGULATION_OF_ACUTE_INFLAMMATORY_RESPONSE                                                    | 43  | 0.691 | 1.503 | <0.0001 | 0.042 |
| GO_NITRIC_OXIDE_SYNTHASE_BIOSYNTHETIC_PROCESS                                                   | 18  | 0.756 | 1.503 | 0.010   | 0.042 |
| GO_TYPE_I_INTERFERON_PRODUCTION                                                                 | 122 | 0.665 | 1.502 | <0.0001 | 0.042 |

|                                                                                             |     |       |       |         |       |
|---------------------------------------------------------------------------------------------|-----|-------|-------|---------|-------|
| GO_POSITIVE_REGULATION_OF_CHEMOTAXIS                                                        | 132 | 0.660 | 1.501 | <0.0001 | 0.042 |
| GO_LEUKOCYTE_CELL_CELL_ADHESION                                                             | 326 | 0.656 | 1.501 | <0.0001 | 0.043 |
| GO_CD4_POSITIVE_ALPHA_BETA_T_CELL_CYTOKINE_PRODUCTION                                       | 22  | 0.730 | 1.500 | 0.011   | 0.043 |
| GO_POSITIVE_REGULATION_OF_LYMPHOCYTE_CHEMOTAXIS                                             | 21  | 0.739 | 1.499 | 0.005   | 0.044 |
| GO_REGULATION_OF_TOLERANCE_INDUCION                                                         | 15  | 0.784 | 1.498 | 0.005   | 0.045 |
| GO_T_CELL_PROLIFERATION                                                                     | 180 | 0.661 | 1.498 | <0.0001 | 0.045 |
| GO_REGULATION_OF_T_HELPER_CELL_DIFFERENTIATION                                              | 35  | 0.704 | 1.498 | <0.0001 | 0.045 |
| GO_REGULATION_OF_GRANULOCYTE_CHEMOTAXIS                                                     | 41  | 0.697 | 1.497 | 0.003   | 0.045 |
| GO_MYELOID_CELL_APOPTOTIC_PROCESS                                                           | 31  | 0.704 | 1.497 | 0.003   | 0.045 |
| GO_POSITIVE_REGULATION_OF_MYELOID_LEUKOCYTE_CYTOKINE_PRODUCTION_INVOLVED_IN_IMMUNE_RESPONSE | 19  | 0.753 | 1.496 | 0.007   | 0.045 |
| GO_REGULATION_OF_TOLL_LIKE_RECEPTOR_SIGNALING_PATHWAY                                       | 66  | 0.674 | 1.496 | <0.0001 | 0.045 |
| GO_NEGATIVE_REGULATION_OF_TUMOR_NECROSIS_FACTOR_SUPERFAMILY_CYTOKINE_PRODUCTION             | 58  | 0.676 | 1.496 | <0.0001 | 0.045 |
| GO_NEGATIVE_REGULATION_OF_CYSSTEINE_TYPE_ENDOPEPTIDASE_ACTIVITY                             | 89  | 0.667 | 1.494 | <0.0001 | 0.046 |
| GO_REGULATION_OF_T_CELL_MIGRATION                                                           | 42  | 0.698 | 1.495 | 0.001   | 0.046 |
| GO_REGULATION_OF_INTERLEUKIN_1_SECRETION                                                    | 50  | 0.679 | 1.494 | 0.001   | 0.046 |
| GO_REGULATION_OF_MICROGLIAL_CELL_ACTIVATION                                                 | 18  | 0.750 | 1.493 | 0.012   | 0.046 |
| GO_POSITIVE_REGULATION_OF_CYTOKINE_PRODUCTION                                               | 445 | 0.647 | 1.493 | <0.0001 | 0.046 |

|                                                                                              |     |       |       |         |       |
|----------------------------------------------------------------------------------------------|-----|-------|-------|---------|-------|
| GO_TYROSINE_PHOSPHORYLATION_OF_STAT_PROTEIN                                                  | 82  | 0.666 | 1.493 | <0.0001 | 0.046 |
| GO_INTERLEUKIN_1_PRODUCTION                                                                  | 100 | 0.666 | 1.493 | <0.0001 | 0.046 |
| GO_REGULATION_OF_NEUTROPHIL_CHEMOTAXIS                                                       | 28  | 0.711 | 1.494 | 0.004   | 0.046 |
| GO_T_CELL_CYTOKINE_PRODUCTION                                                                | 41  | 0.695 | 1.493 | 0.002   | 0.046 |
| GO_NEGATIVE_REGULATION_OF_IMMUNE_RESPONSE                                                    | 147 | 0.656 | 1.492 | <0.0001 | 0.047 |
| GO_NEGATIVE_REGULATION_OF_RESPONSE_TO_BIOTIC_STIMULUS                                        | 90  | 0.667 | 1.492 | <0.0001 | 0.047 |
| GO_ANAPHASE_PROMOTING_COMPLEX_DEPENDENT_CATABOLIC_PROCESS                                    | 80  | 0.659 | 1.490 | <0.0001 | 0.047 |
| GO_MAST_CELL_ACTIVATION                                                                      | 56  | 0.674 | 1.491 | <0.0001 | 0.047 |
| GO_POSITIVE_REGULATION_OF_CHEMOKINE_PRODUCTION                                               | 55  | 0.674 | 1.491 | 0.002   | 0.047 |
| GO_IMMUNOGLOBULIN_SECRETION                                                                  | 22  | 0.726 | 1.491 | 0.010   | 0.047 |
| GO_TOLL_LIKE_RECEPTOR_SIGNALING_PATHWAY                                                      | 142 | 0.657 | 1.491 | <0.0001 | 0.047 |
| GO_POSITIVE_REGULATION_OF_LEUKOCYTE_APOPTOTIC_PROCESS                                        | 26  | 0.717 | 1.491 | 0.003   | 0.047 |
| GO_ANTIGEN_PROCESSING_AND_PRESENTATION_OF_PEPTIDE_OR_POLYSACCHARIDE_ANTIGEN_VIA_MHC_CLASS_II | 100 | 0.662 | 1.489 | <0.0001 | 0.047 |
| GO_LEUKOCYTE_HOMEOSTASIS                                                                     | 83  | 0.666 | 1.488 | <0.0001 | 0.048 |
| GO_REGULATION_OF_NEUTROPHIL_MIGRATION                                                        | 35  | 0.704 | 1.489 | 0.002   | 0.048 |
| GO_IMMUNOGLOBULIN_PRODUCTION_INVOLVED_IN_IMMUNOGLOBULIN_MEDIATED_IMMUNE_RESPONSE             | 53  | 0.672 | 1.489 | <0.0001 | 0.048 |
| GO_REGULATION_OF_T_CELL_ACTIVATION                                                           | 307 | 0.651 | 1.489 | <0.0001 | 0.048 |

|                                                                    |     |       |       |         |       |
|--------------------------------------------------------------------|-----|-------|-------|---------|-------|
| GO_POSITIVE_REGULATION_OF_RECEPTOR_SIGNALING_PATHWAY_VIA_STAT      | 89  | 0.664 | 1.487 | <0.0001 | 0.048 |
| GO_VASCULAR_ENDOTHELIAL_CELL_PROLIFERATION                         | 21  | 0.737 | 1.487 | 0.005   | 0.048 |
| GO_PROTEASOMAL_UBIQUITIN_INDEPENDENT_PROTEIN_CATABOLIC_PROCESS     | 22  | 0.739 | 1.487 | 0.004   | 0.048 |
| REACTOME_DECTIN_2_FAMILY                                           | 26  | 0.739 | 1.551 | 0.002   | 0.048 |
| GO_NEGATIVE_REGULATION_OF_LEUKOCYTE_MIGRATION                      | 42  | 0.690 | 1.486 | 0.001   | 0.048 |
| GO_HUMORAL_IMMUNE_RESPONSE_MEDIATED_BY_CIRCULATING_IMMUNOGLOBULIN  | 46  | 0.687 | 1.486 | 0.002   | 0.048 |
| GO_POSITIVE_REGULATION_OF_RESPONSE_TO_BIOTIC_STIMULUS              | 378 | 0.647 | 1.486 | <0.0001 | 0.048 |
| GO_REGULATION_OF_LEUKOCYTE_DIFFERENTIATION                         | 268 | 0.649 | 1.486 | <0.0001 | 0.048 |
| GO_REGULATION_OF_LEUKOCYTE_ADHESION_TO_VASCULAR_ENDOTHELIAL_CELL   | 21  | 0.722 | 1.485 | 0.010   | 0.049 |
| GO_REGULATION_OF_VIRAL_LIFE_CYCLE                                  | 135 | 0.655 | 1.485 | <0.0001 | 0.049 |
| GO_DETECTION_OF_EXTERNAL_BIOTIC_STIMULUS                           | 19  | 0.736 | 1.484 | 0.011   | 0.049 |
| GO_REGULATION_OF_LYMPHOCYTE_ACTIVATION                             | 411 | 0.646 | 1.484 | <0.0001 | 0.049 |
| GO_LYMPHOCYTE_HOMEOSTASIS                                          | 61  | 0.671 | 1.484 | <0.0001 | 0.049 |
| GO_POSITIVE_REGULATION_OF_TYROSINE_PHOSPHORYLATION_OF_STAT_PROTEIN | 68  | 0.668 | 1.483 | <0.0001 | 0.049 |
| REACTOME_ANTIVIRAL_MECHANISM_BY_IFN_STIMULATED_GENES               | 80  | 0.695 | 1.552 | <0.0001 | 0.050 |
| REACTOME_INITIAL_TRIGGERING_OF_COMPLEMENT                          | 21  | 0.761 | 1.554 | 0.002   | 0.050 |
