# Supplementary material
Source: HighWire-hosted journal article supplement (https://rmdopen.bmj.com/content/9/1/e002694)
Supplement: inline-supplementary-material-8 [file inline-supplementary-material-8.pdf]

Supplementary Table 6. Significantly enriched pathways in the GSEA of glandular epithelial cells

| Pathway name                               | S6 vs C3 |       |       |         |         | S6 vs M3+C3 |       |       |         |         | S6 vs M3 |       |       |         |         |
|--------------------------------------------|----------|-------|-------|---------|---------|-------------|-------|-------|---------|---------|----------|-------|-------|---------|---------|
|                                            | SIZE     | ES    | NES   | NOM     | FDR     | SIZE        | ES    | NES   | NOM     | FDR     | SIZE     | ES    | NES   | NOM     | FDR     |
|                                            |          |       |       | p-value | q-value |             |       |       | p-value | q-value |          |       |       | p-value | q-value |
| HALLMARK_EPITHELIAL_MESENCHYMAL_TRANSITION | 197      | 0.532 | 2.195 | 0.000   | 0.000   | 197         | 0.447 | 1.798 | 0.000   | 0.000   | 197      | 0.263 | 1.058 | 0.305   | 0.372   |
| HALLMARK_APICAL_JUNCTION                   | 194      | 0.507 | 2.090 | 0.000   | 0.000   | 194         | 0.458 | 1.846 | 0.000   | 0.000   | 194      | 0.331 | 1.347 | 0.010   | 0.077   |
| REACTOME_SMOOTH_MUSCLE_CONTRACTION         | 35       | 0.725 | 2.263 | 0.000   | 0.000   | 35          | 0.679 | 2.088 | 0.000   | 0.003   | 35       | 0.470 | 1.448 | 0.044   | 0.195   |
| HALLMARK_KRAS_SIGNALING_UP                 | 193      | 0.448 | 1.838 | 0.000   | 0.001   | 193         | 0.493 | 1.983 | 0.000   | 0.001   | 193      | 0.470 | 1.889 | 0.000   | 0.001   |
| GO_POSITIVE_REGULATION_OF_AXON_EXTENSION   | 44       | 0.676 | 2.205 | 0.000   | 0.001   | 44          | 0.652 | 2.068 | 0.000   | 0.004   | 44       | 0.609 | 1.921 | 0.000   | 0.075   |
| HALLMARK_TGF_BETA_SIGNALING                | 54       | 0.539 | 1.848 | 0.000   | 0.001   | 54          | 0.533 | 1.741 | 0.000   | 0.003   | 54       | 0.467 | 1.555 | 0.016   | 0.043   |
| HALLMARK_INTERFERON_ALPHA_RESPONSE         | 95       | 0.465 | 1.736 | 0.000   | 0.002   | 95          | 0.518 | 1.881 | 0.000   | 0.000   | 95       | 0.412 | 1.482 | 0.013   | 0.034   |

|                                                      |     |       |       |       |       |     |       |       |       |       |     |       |       |       |       |
|------------------------------------------------------|-----|-------|-------|-------|-------|-----|-------|-------|-------|-------|-----|-------|-------|-------|-------|
| HALLMARK_ALLOGRAFT_REJECTION                         | 194 | 0.419 | 1.718 | 0.000 | 0.002 | 194 | 0.338 | 1.357 | 0.010 | 0.056 | 194 | 0.265 | 1.084 | 0.246 | 0.350 |
| HALLMARK_COMPLEMENT                                  | 198 | 0.425 | 1.743 | 0.000 | 0.002 | 198 | 0.404 | 1.620 | 0.000 | 0.006 | 198 | 0.307 | 1.254 | 0.051 | 0.149 |
| GO_PLASMINOGEN_ACTIVATION                            | 24  | 0.764 | 2.158 | 0.000 | 0.003 | 24  | 0.757 | 2.151 | 0.000 | 0.001 | 24  | 0.635 | 1.776 | 0.006 | 0.147 |
| HALLMARK_IL2_STAT5_SIGNALING                         | 195 | 0.401 | 1.668 | 0.000 | 0.004 | 195 | 0.354 | 1.405 | 0.004 | 0.040 | 195 | 0.269 | 1.091 | 0.224 | 0.357 |
| REACTOME_KERATAN_SULFATE_BIOSYNTHESIS                | 27  | 0.677 | 2.003 | 0.000 | 0.005 | 27  | 0.596 | 1.702 | 0.006 | 0.050 | 27  | 0.295 | 0.853 | 0.700 | 0.866 |
| REACTOME_SIGNALING_BY_VEGF                           | 103 | 0.531 | 2.007 | 0.000 | 0.005 | 103 | 0.506 | 1.877 | 0.000 | 0.015 | 103 | 0.390 | 1.433 | 0.019 | 0.206 |
| REACTOME_TGF_BETA_RECEPTOR_SIGNALING_ACTIVATES_SMADS | 32  | 0.649 | 1.995 | 0.000 | 0.005 | 32  | 0.656 | 1.931 | 0.000 | 0.014 | 32  | 0.549 | 1.607 | 0.018 | 0.099 |
| REACTOME_CELL_EXTRACELLULAR_MATRIX_INTERACTIONS      | 18  | 0.768 | 2.014 | 0.000 | 0.005 | 18  | 0.843 | 2.178 | 0.000 | 0.001 | 18  | 0.681 | 1.785 | 0.002 | 0.025 |
| REACTOME_VEGFR2_MEDIATED_CELL_PROLIFERATION          | 19  | 0.737 | 1.984 | 0.000 | 0.006 | 19  | 0.662 | 1.760 | 0.004 | 0.043 | 19  | 0.557 | 1.485 | 0.039 | 0.171 |

|                                                                                                                                  |     |       |       |       |       |     |       |       |       |       |     |       |       |       |       |
|----------------------------------------------------------------------------------------------------------------------------------|-----|-------|-------|-------|-------|-----|-------|-------|-------|-------|-----|-------|-------|-------|-------|
| REACTOME_CELL_JUNCTION_ORGANIZATION                                                                                              | 85  | 0.545 | 2.018 | 0.000 | 0.007 | 85  | 0.470 | 1.678 | 0.004 | 0.055 | 85  | 0.361 | 1.310 | 0.056 | 0.330 |
| REACTOME_REGULATION_OF_INSULIN_LIKE_GROWTH_FACTOR_IGF_TRANSPORT_AND_UPTAKE_BY_INSULIN_LIKE_GROWTH_FACTOR_BINDING_PROTEINS_IGFBPS | 120 | 0.512 | 1.965 | 0.000 | 0.007 | 120 | 0.439 | 1.641 | 0.002 | 0.069 | 120 | 0.272 | 1.040 | 0.353 | 0.648 |
| REACTOME_O_GLYCOSYLATION_OF_TSR_DOMAIN_CONTAINING_PROTEINS                                                                       | 38  | 0.639 | 2.021 | 0.000 | 0.008 | 38  | 0.599 | 1.861 | 0.000 | 0.017 | 38  | 0.462 | 1.444 | 0.042 | 0.199 |
| GO_POSITIVE_REGULATION_OF_CELL_MORPHOGENESIS_INVOLVED_IN_DIFFERENTIATION                                                         | 153 | 0.519 | 2.084 | 0.000 | 0.008 | 153 | 0.512 | 1.986 | 0.000 | 0.014 | 153 | 0.442 | 1.749 | 0.000 | 0.154 |
| GO_POSITIVE_REGULATION_OF_AXONOGENESIS                                                                                           | 87  | 0.561 | 2.071 | 0.000 | 0.008 | 87  | 0.505 | 1.802 | 0.002 | 0.057 | 87  | 0.424 | 1.525 | 0.010 | 0.273 |
| GO_PLATELET_AGGREGATION                                                                                                          | 59  | 0.602 | 2.086 | 0.000 | 0.009 | 59  | 0.577 | 1.925 | 0.000 | 0.023 | 59  | 0.500 | 1.715 | 0.002 | 0.181 |
| REACTOME_EPHB_MEDIATED_FORWARD_SIGNALING                                                                                         | 41  | 0.638 | 2.036 | 0.000 | 0.011 | 41  | 0.614 | 1.894 | 0.000 | 0.017 | 41  | 0.482 | 1.505 | 0.019 | 0.160 |
| HALLMARK_INFLAMMATORY_RESPONSE                                                                                                   | 198 | 0.379 | 1.551 | 0.000 | 0.011 | 198 | 0.362 | 1.445 | 0.002 | 0.029 | 198 | 0.338 | 1.380 | 0.008 | 0.064 |
| GO_REGULATION_OF_MYELOID_LEUKOCYTE_MEDIATED_IMMUNITY                                                                             | 52  | 0.597 | 2.043 | 0.000 | 0.011 | 52  | 0.643 | 2.098 | 0.000 | 0.003 | 52  | 0.542 | 1.798 | 0.000 | 0.128 |

|                                                                       |     |       |       |       |       |     |       |       |       |       |     |        |        |       |       |
|-----------------------------------------------------------------------|-----|-------|-------|-------|-------|-----|-------|-------|-------|-------|-----|--------|--------|-------|-------|
| GO_POSITIVE_REGULATION_OF_SUBSTRATE_ADHESION_DEPENDENT_CELL_SPREADING | 35  | 0.674 | 2.088 | 0.000 | 0.011 | 35  | 0.734 | 2.212 | 0.000 | 0.000 | 35  | 0.616  | 1.914  | 0.000 | 0.062 |
| GO_REGULATION_OF_CELLULAR_EXTRAVASATION                               | 27  | 0.690 | 2.015 | 0.000 | 0.012 | 27  | 0.576 | 1.647 | 0.017 | 0.112 | 27  | 0.445  | 1.279  | 0.156 | 0.426 |
| GO_REGULATION_OF_RECEPTOR_BINDING                                     | 24  | 0.706 | 2.007 | 0.000 | 0.012 | 24  | 0.742 | 2.064 | 0.000 | 0.004 | 24  | 0.488  | 1.375  | 0.083 | 0.373 |
| GO_REGULATION_OF_LEUKOCYTE_DEGRANULATION                              | 43  | 0.612 | 1.997 | 0.000 | 0.012 | 43  | 0.615 | 1.972 | 0.000 | 0.017 | 43  | 0.480  | 1.511  | 0.017 | 0.281 |
| GO_SEMAPHORIN_PLEXIN_SIGNALING_PATHWAY                                | 37  | 0.634 | 2.016 | 0.000 | 0.013 | 37  | 0.619 | 1.876 | 0.002 | 0.036 | 37  | 0.460  | 1.414  | 0.052 | 0.348 |
| HALLMARK_MITOTIC_SPINDLE                                              | 198 | 0.374 | 1.532 | 0.000 | 0.013 | 198 | 0.413 | 1.652 | 0.000 | 0.006 | 198 | 0.349  | 1.410  | 0.006 | 0.054 |
| GO_REGULATION_OF_MEMBRANE_PROTEIN_ECTODOMAIN_PROTEOLYSIS              | 22  | 0.705 | 1.989 | 0.000 | 0.013 | 22  | 0.535 | 1.452 | 0.057 | 0.201 | 22  | -0.365 | -1.000 | 0.437 | 0.759 |
| GO_DETOXIFICATION_OF_INORGANIC_COMPOUND                               | 17  | 0.761 | 1.991 | 0.000 | 0.013 | 17  | 0.753 | 1.943 | 0.000 | 0.020 | 17  | 0.708  | 1.866  | 0.004 | 0.091 |
| GO_RESPONSE_TO_COPPER_ION                                             | 39  | 0.631 | 1.998 | 0.000 | 0.013 | 39  | 0.630 | 1.947 | 0.000 | 0.020 | 39  | 0.501  | 1.534  | 0.018 | 0.265 |

|                                                              |     |       |       |       |       |     |       |       |       |       |     |        |        |       |       |
|--------------------------------------------------------------|-----|-------|-------|-------|-------|-----|-------|-------|-------|-------|-----|--------|--------|-------|-------|
| GO_NEUROMUSCULAR_SYNAPTIC_TRANSMISSION                       | 31  | 0.681 | 2.024 | 0.000 | 0.014 | 31  | 0.634 | 1.839 | 0.004 | 0.048 | 31  | 0.504  | 1.501  | 0.037 | 0.287 |
| GO_NEGATIVE_REGULATION_OF_PEPTIDYL_THREONINE_PHOSPHORYLATION | 17  | 0.780 | 2.017 | 0.000 | 0.014 | 17  | 0.644 | 1.635 | 0.010 | 0.119 | 17  | 0.567  | 1.451  | 0.060 | 0.326 |
| GO_INTEGRIN_MEDIATED_SIGNALING_PATHWAY                       | 96  | 0.534 | 1.974 | 0.000 | 0.015 | 96  | 0.539 | 1.938 | 0.000 | 0.020 | 96  | 0.451  | 1.654  | 0.002 | 0.202 |
| HALLMARK_INTERFERON_GAMMA_RESPONSE                           | 197 | 0.355 | 1.474 | 0.000 | 0.016 | 197 | 0.384 | 1.537 | 0.002 | 0.012 | 197 | 0.290  | 1.169  | 0.114 | 0.250 |
| GO_POSITIVE_REGULATION_OF_STRESS_FIBER_ASSEMBLY              | 48  | 0.585 | 1.966 | 0.000 | 0.016 | 48  | 0.524 | 1.670 | 0.004 | 0.104 | 48  | 0.350  | 1.139  | 0.219 | 0.536 |
| HALLMARK_COAGULATION                                         | 136 | 0.376 | 1.477 | 0.004 | 0.016 | 136 | 0.391 | 1.500 | 0.000 | 0.017 | 136 | -0.277 | -1.061 | 0.328 | 0.387 |
| REACTOME_RHO_GTPASES_ACTIVATE_IQGAPS                         | 30  | 0.625 | 1.860 | 0.000 | 0.017 | 30  | 0.589 | 1.716 | 0.004 | 0.047 | 30  | 0.406  | 1.193  | 0.197 | 0.490 |
| REACTOME_KINESINS                                            | 59  | 0.538 | 1.855 | 0.000 | 0.017 | 59  | 0.553 | 1.847 | 0.000 | 0.018 | 59  | 0.430  | 1.455  | 0.033 | 0.191 |
| GO_DORSAL_SPINAL_CORD_DEVELOPMENT                            | 22  | 0.696 | 1.958 | 0.004 | 0.017 | 22  | 0.556 | 1.526 | 0.037 | 0.164 | 22  | 0.478  | 1.336  | 0.098 | 0.402 |

|                                                          |     |       |       |       |       |     |       |       |       |       |     |       |       |       |       |
|----------------------------------------------------------|-----|-------|-------|-------|-------|-----|-------|-------|-------|-------|-----|-------|-------|-------|-------|
| REACTOME_MET_ACTIVATES_PTK2_SIGNALING                    | 30  | 0.628 | 1.861 | 0.002 | 0.017 | 30  | 0.662 | 1.957 | 0.000 | 0.012 | 30  | 0.527 | 1.558 | 0.031 | 0.126 |
| GO_REGULATION_OF_EXTENT_OF_CELL_GROWTH                   | 107 | 0.518 | 1.951 | 0.000 | 0.017 | 107 | 0.495 | 1.826 | 0.000 | 0.052 | 107 | 0.413 | 1.547 | 0.004 | 0.264 |
| GO_NEGATIVE_REGULATION_OF_COAGULATION                    | 54  | 0.567 | 1.944 | 0.000 | 0.017 | 54  | 0.535 | 1.760 | 0.000 | 0.071 | 54  | 0.386 | 1.293 | 0.095 | 0.415 |
| GO_HOMOTYPIC_CELL_CELL_ADHESION                          | 79  | 0.538 | 1.941 | 0.000 | 0.018 | 79  | 0.464 | 1.617 | 0.004 | 0.126 | 79  | 0.390 | 1.409 | 0.038 | 0.354 |
| GO_POSITIVE_REGULATION_OF_ACTIN_FILAMENT_BUNDLE_ASSEMBLY | 58  | 0.570 | 1.952 | 0.000 | 0.018 | 58  | 0.545 | 1.845 | 0.000 | 0.045 | 58  | 0.416 | 1.387 | 0.045 | 0.367 |
| REACTOME_RHO_GTPASE_CYCLE                                | 135 | 0.469 | 1.863 | 0.000 | 0.018 | 135 | 0.464 | 1.758 | 0.000 | 0.042 | 135 | 0.406 | 1.585 | 0.004 | 0.109 |
| GO_SUBSTRATE_ADHESION_DEPENDENT_CELL_SPREADING           | 93  | 0.521 | 1.944 | 0.000 | 0.018 | 93  | 0.555 | 2.006 | 0.000 | 0.010 | 93  | 0.446 | 1.622 | 0.000 | 0.210 |
| GO_ACTIN_FILAMENT_ORGANIZATION                           | 368 | 0.445 | 1.945 | 0.000 | 0.018 | 368 | 0.449 | 1.916 | 0.000 | 0.025 | 368 | 0.374 | 1.629 | 0.000 | 0.211 |
| REACTOME_TRANSCRIPTIONAL_REGULATION_BY_RUNX3             | 94  | 0.504 | 1.874 | 0.000 | 0.018 | 94  | 0.520 | 1.879 | 0.000 | 0.016 | 94  | 0.477 | 1.753 | 0.000 | 0.031 |

|                                                   |     |       |       |       |       |     |       |       |       |       |     |       |       |       |       |
|---------------------------------------------------|-----|-------|-------|-------|-------|-----|-------|-------|-------|-------|-----|-------|-------|-------|-------|
| REACTOME_SEMA3A_PAK_DEPENDENT_AXON_REPULSION      | 15  | 0.724 | 1.864 | 0.004 | 0.018 | 15  | 0.759 | 1.912 | 0.000 | 0.014 | 15  | 0.704 | 1.763 | 0.000 | 0.029 |
| REACTOME_POST_CHAPERONIN_TUBULIN_FOLDING_PATHWAY  | 23  | 0.670 | 1.867 | 0.000 | 0.019 | 23  | 0.558 | 1.528 | 0.031 | 0.113 | 23  | 0.310 | 0.865 | 0.680 | 0.865 |
| REACTOME_CELL_CELL_COMMUNICATION                  | 121 | 0.488 | 1.876 | 0.000 | 0.019 | 121 | 0.462 | 1.737 | 0.000 | 0.043 | 121 | 0.374 | 1.422 | 0.014 | 0.216 |
| GO_SMOOTH_MUSCLE_CELL_MIGRATION                   | 66  | 0.547 | 1.934 | 0.000 | 0.019 | 66  | 0.630 | 2.128 | 0.000 | 0.001 | 66  | 0.549 | 1.897 | 0.000 | 0.076 |
| GO_REGULATION_OF_AXONOGENESIS                     | 181 | 0.469 | 1.915 | 0.000 | 0.019 | 181 | 0.431 | 1.703 | 0.000 | 0.095 | 181 | 0.327 | 1.311 | 0.039 | 0.413 |
| GO_AXON_EXTENSION                                 | 120 | 0.498 | 1.928 | 0.000 | 0.019 | 120 | 0.479 | 1.784 | 0.000 | 0.060 | 120 | 0.406 | 1.549 | 0.002 | 0.262 |
| GO_CELLULAR_RESPONSE_TO_COPPER_ION                | 27  | 0.660 | 1.917 | 0.000 | 0.019 | 27  | 0.625 | 1.825 | 0.000 | 0.051 | 27  | 0.507 | 1.447 | 0.054 | 0.331 |
| GO_REGULATION_OF_ESTABLISHMENT_OF_PLANAR_POLARITY | 109 | 0.506 | 1.918 | 0.000 | 0.020 | 109 | 0.466 | 1.737 | 0.002 | 0.081 | 109 | 0.424 | 1.583 | 0.002 | 0.233 |
| GO_FIBRINOLYSIS                                   | 28  | 0.645 | 1.929 | 0.000 | 0.020 | 28  | 0.614 | 1.784 | 0.004 | 0.061 | 28  | 0.501 | 1.454 | 0.050 | 0.324 |

|                                                                   |     |       |       |       |       |     |       |       |       |       |     |        |        |       |       |
|-------------------------------------------------------------------|-----|-------|-------|-------|-------|-----|-------|-------|-------|-------|-----|--------|--------|-------|-------|
| REACTOME_EPH_EPHRIN_SIGNALING                                     | 91  | 0.495 | 1.840 | 0.000 | 0.020 | 91  | 0.453 | 1.636 | 0.002 | 0.068 | 91  | 0.322  | 1.182  | 0.152 | 0.498 |
| GO_T_CELL_MIGRATION                                               | 63  | 0.554 | 1.919 | 0.000 | 0.020 | 63  | 0.387 | 1.311 | 0.069 | 0.275 | 63  | -0.261 | -0.888 | 0.676 | 0.866 |
| REACTOME_G_ALPHA_12_13_SIGNALLING_EVENTS                          | 78  | 0.517 | 1.876 | 0.000 | 0.020 | 78  | 0.484 | 1.690 | 0.002 | 0.051 | 78  | 0.373  | 1.336  | 0.044 | 0.302 |
| GO_EMBRYO_IMPLANTATION                                            | 46  | 0.585 | 1.908 | 0.000 | 0.021 | 46  | 0.534 | 1.713 | 0.000 | 0.088 | 46  | 0.449  | 1.453  | 0.040 | 0.324 |
| GO_REGULATION_OF_MAST_CELL_ACTIVATION_INVOLVED_IN_IMMUNE_RESPONSE | 29  | 0.638 | 1.919 | 0.002 | 0.021 | 29  | 0.618 | 1.782 | 0.002 | 0.060 | 29  | 0.515  | 1.503  | 0.022 | 0.285 |
| GO_POSITIVE_REGULATION_OF_T_HELPER_1_TYPE_IMMUNE_RESPONSE         | 19  | 0.708 | 1.921 | 0.004 | 0.021 | 19  | 0.654 | 1.744 | 0.004 | 0.079 | 19  | 0.521  | 1.378  | 0.082 | 0.374 |
| GO_CELL_JUNCTION_ORGANIZATION                                     | 281 | 0.444 | 1.896 | 0.000 | 0.021 | 281 | 0.390 | 1.627 | 0.000 | 0.123 | 281 | -0.287 | -1.212 | 0.041 | 0.594 |
| GO_MEMBRANE_RAFT_ORGANIZATION                                     | 23  | 0.676 | 1.904 | 0.000 | 0.021 | 23  | 0.585 | 1.617 | 0.012 | 0.126 | 23  | 0.446  | 1.235  | 0.195 | 0.455 |
| GO_REGULATION_OF_ACTIN_FILAMENT_ORGANIZATION                      | 238 | 0.449 | 1.896 | 0.000 | 0.022 | 238 | 0.462 | 1.893 | 0.000 | 0.033 | 238 | 0.406  | 1.690  | 0.000 | 0.184 |



|                                                                                                         |     |       |       |       |       |     |       |       |       |       |     |        |        |       |       |
|---------------------------------------------------------------------------------------------------------|-----|-------|-------|-------|-------|-----|-------|-------|-------|-------|-----|--------|--------|-------|-------|
| REACTOME_GOLGI_TO_ER_RETROGRADE_TRANSPORT                                                               | 129 | 0.468 | 1.832 | 0.000 | 0.022 | 129 | 0.408 | 1.561 | 0.008 | 0.095 | 129 | 0.296  | 1.133  | 0.198 | 0.533 |
| REACTOME_LDL_CLEARANCE                                                                                  | 19  | 0.705 | 1.877 | 0.000 | 0.022 | 19  | 0.747 | 1.915 | 0.000 | 0.015 | 19  | 0.678  | 1.806  | 0.002 | 0.021 |
| GO_EPIBOLY                                                                                              | 29  | 0.653 | 1.897 | 0.000 | 0.022 | 29  | 0.434 | 1.235 | 0.165 | 0.333 | 29  | -0.415 | -1.192 | 0.232 | 0.609 |
| GO_POSITIVE_REGULATION_OF_MYELOID_LEUKOCYTE_MEDIATED_IMMUNITY                                           | 30  | 0.624 | 1.899 | 0.000 | 0.022 | 30  | 0.646 | 1.910 | 0.000 | 0.026 | 30  | 0.568  | 1.716  | 0.004 | 0.189 |
| REACTOME_GAP_JUNCTION_TRAFFICKING_AND_REGULATION                                                        | 50  | 0.555 | 1.826 | 0.000 | 0.022 | 50  | 0.432 | 1.411 | 0.047 | 0.174 | 50  | -0.377 | -1.220 | 0.145 | 0.484 |
| REACTOME_REGULATION_OF_RUNX3_EXPRESSION_AND_ACTIVITY                                                    | 54  | 0.554 | 1.881 | 0.000 | 0.022 | 54  | 0.588 | 1.944 | 0.000 | 0.012 | 54  | 0.629  | 2.126  | 0.000 | 0.000 |
| GO_PODOSOME_ASSEMBLY                                                                                    | 19  | 0.701 | 1.900 | 0.000 | 0.022 | 19  | 0.628 | 1.610 | 0.014 | 0.127 | 19  | 0.416  | 1.101  | 0.339 | 0.564 |
| REACTOME_NEF_MEDIATES_DOWN_MODULATION_OF_CELL_SURFACE_RECEPTORS_BY_RECRUITING_THEM_TO_CLATHRIN_ADAPTERS | 21  | 0.657 | 1.817 | 0.000 | 0.023 | 21  | 0.537 | 1.419 | 0.073 | 0.167 | 21  | 0.253  | 0.688  | 0.925 | 0.981 |
| REACTOME_SIGNALLING_TO_RAS                                                                              | 20  | 0.680 | 1.819 | 0.002 | 0.023 | 20  | 0.556 | 1.484 | 0.040 | 0.135 | 20  | 0.409  | 1.092  | 0.331 | 0.570 |

|                                                                                  |     |       |       |       |       |     |       |       |       |       |     |       |       |       |       |
|----------------------------------------------------------------------------------|-----|-------|-------|-------|-------|-----|-------|-------|-------|-------|-----|-------|-------|-------|-------|
| REACTOME_TGF_BETA_RECEPTOR_SIGNALING_IN_EMT_EPITHELIAL_TO_MESENCHYMAL_TRANSITION | 15  | 0.721 | 1.808 | 0.006 | 0.025 | 15  | 0.632 | 1.567 | 0.018 | 0.095 | 15  | 0.487 | 1.221 | 0.214 | 0.453 |
| GO_NEURON_PROJECTION_EXTENSION                                                   | 163 | 0.474 | 1.881 | 0.000 | 0.025 | 163 | 0.464 | 1.804 | 0.000 | 0.058 | 163 | 0.379 | 1.494 | 0.004 | 0.292 |
| GO_POSITIVE_REGULATION_OF_SMOOTH_MUSCLE_CELL_MIGRATION                           | 37  | 0.599 | 1.883 | 0.002 | 0.025 | 37  | 0.657 | 2.024 | 0.000 | 0.008 | 37  | 0.539 | 1.651 | 0.006 | 0.203 |
| GO_VASCULAR_ENDOTHELIAL_GROWTH_FACTOR_SIGNALING_PATHWAY                          | 33  | 0.610 | 1.877 | 0.000 | 0.026 | 33  | 0.541 | 1.616 | 0.008 | 0.125 | 33  | 0.451 | 1.358 | 0.080 | 0.385 |
| GO_POSITIVE_REGULATION_OF_EXCITATORY_POSTSYNAPTIC_POTENTIAL                      | 28  | 0.632 | 1.874 | 0.002 | 0.026 | 28  | 0.585 | 1.659 | 0.006 | 0.109 | 28  | 0.461 | 1.308 | 0.108 | 0.412 |
| REACTOME_REGULATION_OF_RAS_BY_GAPS                                               | 67  | 0.499 | 1.793 | 0.000 | 0.027 | 67  | 0.534 | 1.853 | 0.000 | 0.017 | 67  | 0.598 | 2.043 | 0.000 | 0.001 |
| REACTOME_COPI_DEPENDENT_GOLGI_TO_ER_RETROGRADE_TRAFFIC                           | 95  | 0.486 | 1.796 | 0.000 | 0.027 | 95  | 0.456 | 1.635 | 0.000 | 0.067 | 95  | 0.329 | 1.187 | 0.162 | 0.499 |
| REACTOME_PCP_CE_PATHWAY                                                          | 90  | 0.490 | 1.789 | 0.000 | 0.027 | 90  | 0.528 | 1.867 | 0.000 | 0.016 | 90  | 0.544 | 1.967 | 0.000 | 0.006 |
| GO_MUSCLE_CELL_MIGRATION                                                         | 79  | 0.521 | 1.861 | 0.000 | 0.028 | 79  | 0.630 | 2.187 | 0.000 | 0.001 | 79  | 0.555 | 1.971 | 0.000 | 0.091 |

|                                                  |     |       |       |       |       |     |       |       |       |       |     |       |       |       |       |
|--------------------------------------------------|-----|-------|-------|-------|-------|-----|-------|-------|-------|-------|-----|-------|-------|-------|-------|
| GO_REGULATION_OF_CELLULAR_COMPONENT_SIZE         | 348 | 0.428 | 1.861 | 0.000 | 0.028 | 348 | 0.426 | 1.803 | 0.000 | 0.057 | 348 | 0.373 | 1.621 | 0.000 | 0.206 |
| GO_CELL_JUNCTION_ASSEMBLY                        | 239 | 0.442 | 1.861 | 0.000 | 0.029 | 239 | 0.402 | 1.650 | 0.000 | 0.111 | 239 | 0.300 | 1.236 | 0.056 | 0.454 |
| GO_ESTABLISHMENT_OF_ENDOTHELIAL_BARRIER          | 40  | 0.596 | 1.863 | 0.000 | 0.029 | 40  | 0.516 | 1.578 | 0.007 | 0.142 | 40  | 0.355 | 1.112 | 0.285 | 0.559 |
| GO_PINOCYTOSIS                                   | 20  | 0.692 | 1.857 | 0.002 | 0.029 | 20  | 0.546 | 1.442 | 0.067 | 0.204 | 20  | 0.362 | 0.970 | 0.488 | 0.705 |
| REACTOME_O_LINKED_GLYCOSYLATION                  | 103 | 0.471 | 1.770 | 0.000 | 0.029 | 103 | 0.451 | 1.649 | 0.000 | 0.067 | 103 | 0.324 | 1.200 | 0.154 | 0.483 |
| GO_TRACHEA_DEVELOPMENT                           | 20  | 0.672 | 1.853 | 0.002 | 0.029 | 20  | 0.671 | 1.785 | 0.004 | 0.063 | 20  | 0.526 | 1.428 | 0.082 | 0.343 |
| GO_REGULATION_OF_T_HELPER_1_TYPE_IMMUNE_RESPONSE | 26  | 0.630 | 1.852 | 0.000 | 0.029 | 26  | 0.559 | 1.565 | 0.012 | 0.147 | 26  | 0.333 | 0.955 | 0.491 | 0.727 |
| GO_LONG_TERM_SYNAPTIC_POTENTIATION               | 85  | 0.505 | 1.866 | 0.000 | 0.029 | 85  | 0.414 | 1.474 | 0.012 | 0.188 | 85  | 0.278 | 0.999 | 0.428 | 0.671 |
| REACTOME_CRMP5_IN_SEMA3A_SIGNALING               | 16  | 0.681 | 1.767 | 0.000 | 0.029 | 16  | 0.802 | 1.998 | 0.000 | 0.010 | 16  | 0.563 | 1.454 | 0.072 | 0.190 |

|                                                                 |     |       |       |       |       |     |       |       |       |       |     |       |       |       |       |
|-----------------------------------------------------------------|-----|-------|-------|-------|-------|-----|-------|-------|-------|-------|-----|-------|-------|-------|-------|
| GO_REGULATION_OF_CELL_MORPHOGENESIS_INVOLVED_IN_DIFFERENTIATION | 293 | 0.436 | 1.863 | 0.000 | 0.029 | 293 | 0.444 | 1.851 | 0.000 | 0.042 | 293 | 0.372 | 1.579 | 0.000 | 0.235 |
| GO_CELL_SUBSTRATE_JUNCTION_ORGANIZATION                         | 97  | 0.500 | 1.854 | 0.000 | 0.029 | 97  | 0.440 | 1.590 | 0.002 | 0.134 | 97  | 0.333 | 1.235 | 0.105 | 0.454 |
| REACTOME_SYNDECAN_INTERACTIONS                                  | 27  | 0.593 | 1.772 | 0.006 | 0.029 | 27  | 0.468 | 1.335 | 0.113 | 0.241 | 27  | 0.409 | 1.172 | 0.216 | 0.507 |
| GO_REGULATION_OF_SYNAPTIC_PLASTICITY                            | 182 | 0.453 | 1.864 | 0.000 | 0.029 | 182 | 0.380 | 1.507 | 0.000 | 0.171 | 182 | 0.296 | 1.189 | 0.104 | 0.493 |
| REACTOME_BETA_CATENIN_INDEPENDENT_WNT_SIGNALING                 | 141 | 0.457 | 1.778 | 0.000 | 0.030 | 141 | 0.492 | 1.883 | 0.000 | 0.016 | 141 | 0.478 | 1.867 | 0.000 | 0.011 |
| REACTOME_DOWNREGULATION_OF_TGF_BETA_RECEPTOR_SIGNALING          | 26  | 0.620 | 1.773 | 0.002 | 0.030 | 26  | 0.665 | 1.878 | 0.000 | 0.015 | 26  | 0.587 | 1.669 | 0.008 | 0.064 |
| GO_REGULATION_OF_CELL_MORPHOGENESIS                             | 473 | 0.411 | 1.849 | 0.000 | 0.030 | 473 | 0.432 | 1.883 | 0.000 | 0.036 | 473 | 0.360 | 1.601 | 0.000 | 0.230 |
| REACTOME_ANTIGEN_PROCESSING_CROSS_PRESENTATION                  | 96  | 0.474 | 1.775 | 0.000 | 0.030 | 96  | 0.449 | 1.658 | 0.000 | 0.062 | 96  | 0.415 | 1.499 | 0.006 | 0.161 |
| GO_CHONDROCYTE_DIFFERENTIATION                                  | 116 | 0.482 | 1.846 | 0.000 | 0.030 | 116 | 0.418 | 1.566 | 0.006 | 0.147 | 116 | 0.291 | 1.088 | 0.267 | 0.576 |

|                                                               |     |       |       |       |       |     |       |       |       |       |     |        |        |       |       |
|---------------------------------------------------------------|-----|-------|-------|-------|-------|-----|-------|-------|-------|-------|-----|--------|--------|-------|-------|
| GO_REGULATION_OF_ACTIN_CYTOSKELETON_REORGANIZATION            | 36  | 0.597 | 1.842 | 0.000 | 0.031 | 36  | 0.575 | 1.748 | 0.002 | 0.079 | 36  | 0.433  | 1.338  | 0.072 | 0.402 |
| REACTOME_RECYCLING_PATHWAY_OF_L1                              | 47  | 0.541 | 1.759 | 0.000 | 0.031 | 47  | 0.613 | 1.964 | 0.000 | 0.013 | 47  | 0.498  | 1.630  | 0.012 | 0.085 |
| REACTOME KERATAN SULFATE KERATIN METABOLISM                   | 33  | 0.581 | 1.761 | 0.002 | 0.031 | 33  | 0.466 | 1.389 | 0.081 | 0.189 | 33  | -0.357 | -1.046 | 0.375 | 0.685 |
| GO_REGULATION_OF_PODOSOME_ASSEMBLY                            | 15  | 0.721 | 1.842 | 0.008 | 0.031 | 15  | 0.714 | 1.808 | 0.006 | 0.058 | 15  | 0.546  | 1.340  | 0.116 | 0.400 |
| GO_ACTIN_POLYMERIZATION_OR_DEPOLYMERIZATION                   | 190 | 0.450 | 1.843 | 0.000 | 0.031 | 190 | 0.470 | 1.877 | 0.000 | 0.038 | 190 | 0.406  | 1.650  | 0.000 | 0.201 |
| GO_REGULATION_OF_PLATELET_AGGREGATION                         | 18  | 0.687 | 1.838 | 0.000 | 0.032 | 18  | 0.669 | 1.733 | 0.006 | 0.080 | 18  | 0.457  | 1.193  | 0.230 | 0.488 |
| GO_REGULATION_OF_RENAL_SYSTEM_PROCESS                         | 35  | 0.582 | 1.827 | 0.000 | 0.033 | 35  | 0.411 | 1.221 | 0.182 | 0.344 | 35  | -0.330 | -0.994 | 0.465 | 0.766 |
| GO_EXTRACELLULAR_STRUCTURE_ORGANIZATION                       | 356 | 0.418 | 1.828 | 0.000 | 0.034 | 356 | 0.362 | 1.537 | 0.000 | 0.160 | 356 | -0.246 | -1.039 | 0.336 | 0.726 |
| REACTOME_DISEASES_ASSOCIATED_WITH_O_GLYCOSYLATION_OF_PROTEINS | 64  | 0.498 | 1.748 | 0.000 | 0.034 | 64  | 0.469 | 1.600 | 0.004 | 0.082 | 64  | 0.343  | 1.191  | 0.148 | 0.490 |

|                                                                    |    |       |       |       |       |    |       |       |       |       |    |       |       |       |       |
|--------------------------------------------------------------------|----|-------|-------|-------|-------|----|-------|-------|-------|-------|----|-------|-------|-------|-------|
| GO_POSITIVE_REGULATION_OF_INTERLEUKIN_6_SECRETION                  | 31 | 0.606 | 1.828 | 0.000 | 0.034 | 31 | 0.496 | 1.446 | 0.039 | 0.202 | 31 | 0.301 | 0.902 | 0.635 | 0.794 |
| GO_POSITIVE_REGULATION_OF_REGULATED_SECRETORY_PATHWAY              | 51 | 0.544 | 1.831 | 0.000 | 0.034 | 51 | 0.568 | 1.867 | 0.000 | 0.037 | 51 | 0.446 | 1.478 | 0.016 | 0.312 |
| GO_NEGATIVE_REGULATION_OF_PLATELET_ACTIVATION                      | 19 | 0.677 | 1.828 | 0.000 | 0.034 | 19 | 0.580 | 1.494 | 0.051 | 0.175 | 19 | 0.327 | 0.859 | 0.683 | 0.853 |
| REACTOME_REGULATION_OF_ACTIN_DYNAMICS_FOR_PHAGOCYTIC_CUP_FORMATION | 60 | 0.496 | 1.743 | 0.002 | 0.035 | 60 | 0.520 | 1.742 | 0.004 | 0.043 | 60 | 0.532 | 1.789 | 0.000 | 0.024 |
| GO_ENDODERM_FORMATION                                              | 50 | 0.546 | 1.824 | 0.000 | 0.035 | 50 | 0.580 | 1.856 | 0.000 | 0.042 | 50 | 0.494 | 1.621 | 0.002 | 0.209 |
| REACTOME_SIGNALING_BY_RAS_MUTANTS                                  | 58 | 0.517 | 1.739 | 0.000 | 0.035 | 58 | 0.498 | 1.660 | 0.002 | 0.062 | 58 | 0.464 | 1.562 | 0.006 | 0.123 |
| GO_POSITIVE_REGULATION_OF_CELLULAR_EXTRAVASATION                   | 16 | 0.703 | 1.821 | 0.006 | 0.036 | 16 | 0.642 | 1.606 | 0.012 | 0.128 | 16 | 0.498 | 1.261 | 0.165 | 0.433 |
| REACTOME_NON_INTEGRIN_MEMBRANE_ECM_INTERACTIONS                    | 59 | 0.510 | 1.734 | 0.002 | 0.037 | 59 | 0.418 | 1.422 | 0.043 | 0.166 | 59 | 0.312 | 1.052 | 0.346 | 0.626 |
| GO_CELLULAR_RESPONSE_TO_ZINC_ION                                   | 23 | 0.649 | 1.818 | 0.002 | 0.037 | 23 | 0.683 | 1.869 | 0.006 | 0.038 | 23 | 0.689 | 1.962 | 0.000 | 0.052 |

|                                                        |     |       |       |       |       |     |       |       |       |       |     |       |       |       |       |
|--------------------------------------------------------|-----|-------|-------|-------|-------|-----|-------|-------|-------|-------|-----|-------|-------|-------|-------|
| GO_PURINE_NUCLEOSIDE_BIOSYNTHETIC_PROCESS              | 21  | 0.663 | 1.814 | 0.002 | 0.038 | 21  | 0.587 | 1.553 | 0.033 | 0.152 | 21  | 0.276 | 0.755 | 0.822 | 0.939 |
| GO_INACTIVATION_OF_MAPK_ACTIVITY                       | 27  | 0.619 | 1.812 | 0.002 | 0.039 | 27  | 0.616 | 1.760 | 0.000 | 0.072 | 27  | 0.581 | 1.680 | 0.008 | 0.190 |
| GO_ENDOTHELIAL_CELL_DEVELOPMENT                        | 55  | 0.542 | 1.811 | 0.000 | 0.039 | 55  | 0.517 | 1.699 | 0.002 | 0.093 | 55  | 0.431 | 1.442 | 0.022 | 0.336 |
| GO_POSITIVE_REGULATION_OF_HUMORAL_IMMUNE_RESPONSE      | 16  | 0.694 | 1.798 | 0.004 | 0.040 | 16  | 0.793 | 1.971 | 0.000 | 0.016 | 16  | 0.756 | 1.875 | 0.000 | 0.086 |
| GO_LENS_FIBER_CELL_DIFFERENTIATION                     | 29  | 0.611 | 1.799 | 0.000 | 0.040 | 29  | 0.588 | 1.736 | 0.006 | 0.079 | 29  | 0.480 | 1.418 | 0.061 | 0.346 |
| GO_ACTIN_FILAMENT_BUNDLE_ORGANIZATION                  | 147 | 0.458 | 1.807 | 0.000 | 0.040 | 147 | 0.433 | 1.680 | 0.000 | 0.100 | 147 | 0.362 | 1.421 | 0.014 | 0.346 |
| REACTOME_CELLULAR_HEXOSE_TRANSPORT                     | 20  | 0.637 | 1.724 | 0.010 | 0.040 | 20  | 0.516 | 1.400 | 0.084 | 0.185 | 20  | 0.434 | 1.183 | 0.243 | 0.499 |
| GO_REGULATION_OF_CELL_SIZE                             | 172 | 0.446 | 1.799 | 0.000 | 0.040 | 172 | 0.424 | 1.668 | 0.000 | 0.105 | 172 | 0.363 | 1.453 | 0.006 | 0.324 |
| GO_POSITIVE_REGULATION_OF_CELL_PROJECTION_ORGANIZATION | 362 | 0.412 | 1.799 | 0.000 | 0.041 | 362 | 0.389 | 1.673 | 0.000 | 0.105 | 362 | 0.293 | 1.264 | 0.022 | 0.435 |

|                                                                        |     |       |       |       |       |     |       |       |       |       |     |        |        |       |       |
|------------------------------------------------------------------------|-----|-------|-------|-------|-------|-----|-------|-------|-------|-------|-----|--------|--------|-------|-------|
| GO_REGULATION_OF_T_CELL_MIGRATION                                      | 42  | 0.564 | 1.800 | 0.002 | 0.041 | 42  | 0.369 | 1.134 | 0.279 | 0.430 | 42  | -0.338 | -1.066 | 0.344 | 0.713 |
| GO_DEVELOPMENTAL_GROWTH_INVOLVED_IN_MORPHOGENESIS                      | 226 | 0.431 | 1.803 | 0.000 | 0.041 | 226 | 0.425 | 1.712 | 0.000 | 0.087 | 226 | 0.337  | 1.377  | 0.010 | 0.373 |
| GO_REGULATION_OF_ACTIN_FILAMENT_BASED_PROCESS                          | 358 | 0.412 | 1.801 | 0.000 | 0.041 | 358 | 0.420 | 1.788 | 0.000 | 0.062 | 358 | 0.339  | 1.473  | 0.000 | 0.316 |
| REACTOME_RESPONSE_TO_ELEVATED_PLATELET_CYTOSOLIC_CA2PLUS               | 130 | 0.441 | 1.716 | 0.000 | 0.041 | 130 | 0.431 | 1.637 | 0.000 | 0.068 | 130 | 0.297  | 1.147  | 0.185 | 0.522 |
| GO_REGULATION_OF_POSITIVE_CHEMOTAXIS                                   | 25  | 0.636 | 1.803 | 0.000 | 0.041 | 25  | 0.583 | 1.632 | 0.016 | 0.120 | 25  | 0.309  | 0.865  | 0.650 | 0.847 |
| GO_REGULATION_OF_PEPTIDYL_THREONINE_PHOSPHORYLATION                    | 43  | 0.561 | 1.801 | 0.000 | 0.041 | 43  | 0.437 | 1.397 | 0.065 | 0.228 | 43  | 0.288  | 0.899  | 0.641 | 0.797 |
| REACTOME_CHONDROITIN_SULFATE_BIOSYNTHESIS                              | 20  | 0.634 | 1.717 | 0.000 | 0.042 | 20  | 0.572 | 1.527 | 0.033 | 0.113 | 20  | 0.401  | 1.084  | 0.337 | 0.581 |
| REACTOME_THE_ROLE_OF_NEF_IN_HIV_1_REPLICATION_AND_DISEASE_PATHOGENESIS | 27  | 0.597 | 1.718 | 0.004 | 0.042 | 27  | 0.511 | 1.466 | 0.049 | 0.142 | 27  | -0.227 | -0.662 | 0.929 | 1.000 |
| GO_POSTSYNAPTIC_CYTOSKELETON_ORGANIZATION                              | 18  | 0.671 | 1.789 | 0.000 | 0.043 | 18  | 0.655 | 1.741 | 0.002 | 0.080 | 18  | 0.550  | 1.434  | 0.081 | 0.339 |



|                                                                  |     |       |       |       |       |     |       |       |       |       |     |        |        |       |       |
|------------------------------------------------------------------|-----|-------|-------|-------|-------|-----|-------|-------|-------|-------|-----|--------|--------|-------|-------|
| GO_POSITIVE_REGULATION_OF_I_KAPPAB_KINASE_NF_KAPPAB_SIGNALING    | 178 | 0.440 | 1.790 | 0.000 | 0.043 | 178 | 0.397 | 1.577 | 0.000 | 0.142 | 178 | 0.270  | 1.103  | 0.220 | 0.564 |
| GO_RETINAL_GANGLION_CELL_AXON_GUIDANCE                           | 21  | 0.656 | 1.787 | 0.004 | 0.043 | 21  | 0.467 | 1.273 | 0.157 | 0.301 | 21  | -0.298 | -0.807 | 0.747 | 0.925 |
| GO_ZINC_ION_HOMEOSTASIS                                          | 37  | 0.570 | 1.785 | 0.000 | 0.044 | 37  | 0.502 | 1.551 | 0.024 | 0.153 | 37  | 0.410  | 1.283  | 0.122 | 0.423 |
| GO_PLATELET_ACTIVATION                                           | 152 | 0.444 | 1.770 | 0.000 | 0.044 | 152 | 0.414 | 1.601 | 0.000 | 0.131 | 152 | 0.388  | 1.527  | 0.002 | 0.271 |
| GO_HIPPO_SIGNALING                                               | 38  | 0.564 | 1.768 | 0.007 | 0.044 | 38  | 0.498 | 1.504 | 0.022 | 0.171 | 38  | 0.293  | 0.918  | 0.587 | 0.778 |
| GO_VASCULAR_ENDOTHELIAL_GROWTH_FACTOR_RECEPTOR_SIGNALING_PATHWAY | 87  | 0.480 | 1.767 | 0.000 | 0.044 | 87  | 0.448 | 1.598 | 0.002 | 0.132 | 87  | 0.316  | 1.136  | 0.239 | 0.541 |
| GO_EXTRACELLULAR_MATRIX_ASSEMBLY                                 | 40  | 0.554 | 1.768 | 0.006 | 0.044 | 40  | 0.481 | 1.502 | 0.018 | 0.172 | 40  | 0.382  | 1.197  | 0.191 | 0.486 |
| GO_KERATAN_SULFATE_METABOLIC_PROCESS                             | 33  | 0.580 | 1.770 | 0.004 | 0.044 | 33  | 0.478 | 1.440 | 0.050 | 0.204 | 33  | -0.360 | -1.087 | 0.331 | 0.697 |
| REACTOME_INTERLEUKIN_10_SIGNALING                                | 45  | 0.521 | 1.707 | 0.004 | 0.045 | 45  | 0.492 | 1.572 | 0.016 | 0.095 | 45  | 0.365  | 1.175  | 0.195 | 0.509 |

|                                                   |     |       |       |       |       |     |       |       |       |       |     |       |       |       |       |
|---------------------------------------------------|-----|-------|-------|-------|-------|-----|-------|-------|-------|-------|-----|-------|-------|-------|-------|
| REACTOME_SIGNAL_TRANSDUCTION_BY_L1                | 19  | 0.631 | 1.705 | 0.012 | 0.045 | 19  | 0.505 | 1.339 | 0.126 | 0.237 | 19  | 0.239 | 0.644 | 0.943 | 0.983 |
| GO_CELL_SUBSTRATE_ADHESION                        | 333 | 0.411 | 1.773 | 0.000 | 0.045 | 333 | 0.399 | 1.687 | 0.000 | 0.096 | 333 | 0.323 | 1.391 | 0.004 | 0.365 |
| GO_POSITIVE_REGULATION_OF_NEUTROPHIL_MIGRATION    | 27  | 0.604 | 1.774 | 0.002 | 0.045 | 27  | 0.528 | 1.502 | 0.047 | 0.172 | 27  | 0.346 | 0.999 | 0.436 | 0.672 |
| GO_NEPHRON_TUBULE_EPITHELIAL_CELL_DIFFERENTIATION | 15  | 0.702 | 1.772 | 0.002 | 0.045 | 15  | 0.639 | 1.590 | 0.026 | 0.134 | 15  | 0.461 | 1.157 | 0.288 | 0.514 |
| GO_REGULATION_OF_NEURON_PROJECTION_DEVELOPMENT    | 477 | 0.394 | 1.771 | 0.000 | 0.045 | 477 | 0.385 | 1.679 | 0.000 | 0.101 | 477 | 0.302 | 1.333 | 0.002 | 0.408 |
| GO_CELLULAR_EXTRAVASATION                         | 60  | 0.511 | 1.770 | 0.000 | 0.045 | 60  | 0.429 | 1.432 | 0.027 | 0.207 | 60  | 0.276 | 0.936 | 0.596 | 0.753 |
| GO_NEGATIVE_REGULATION_OF_WOUND_HEALING           | 72  | 0.499 | 1.777 | 0.000 | 0.045 | 72  | 0.492 | 1.717 | 0.000 | 0.086 | 72  | 0.400 | 1.401 | 0.030 | 0.361 |
| GO_REGULATION_OF_ANATOMICAL_STRUCTURE_SIZE        | 476 | 0.394 | 1.775 | 0.000 | 0.045 | 476 | 0.395 | 1.722 | 0.000 | 0.084 | 476 | 0.352 | 1.563 | 0.000 | 0.250 |
| GO_MAST_CELL_MEDIATED_IMMUNITY                    | 45  | 0.548 | 1.781 | 0.002 | 0.045 | 45  | 0.561 | 1.769 | 0.000 | 0.067 | 45  | 0.494 | 1.598 | 0.009 | 0.226 |

|                                                  |     |       |       |       |       |     |       |       |       |       |     |        |        |       |       |
|--------------------------------------------------|-----|-------|-------|-------|-------|-----|-------|-------|-------|-------|-----|--------|--------|-------|-------|
| GO_REGULATION_OF_AMPA_RECEPTOR_ACTIVITY          | 24  | 0.633 | 1.774 | 0.002 | 0.045 | 24  | 0.479 | 1.331 | 0.109 | 0.263 | 24  | 0.301  | 0.834  | 0.705 | 0.876 |
| GO_DENDRITIC_SPINE_MORPHOGENESIS                 | 59  | 0.511 | 1.776 | 0.000 | 0.045 | 59  | 0.485 | 1.616 | 0.004 | 0.125 | 59  | 0.327  | 1.108  | 0.269 | 0.562 |
| REACTOME_GLYCOSAMINOGLYCAN_METABOLISM            | 122 | 0.431 | 1.688 | 0.002 | 0.045 | 122 | 0.380 | 1.441 | 0.015 | 0.157 | 122 | -0.281 | -1.062 | 0.320 | 0.662 |
| GO_REGULATION_OF_COAGULATION                     | 81  | 0.494 | 1.778 | 0.000 | 0.045 | 81  | 0.442 | 1.549 | 0.002 | 0.154 | 81  | -0.302 | -1.066 | 0.315 | 0.715 |
| GO_CHONDROCYTE_DEVELOPMENT                       | 44  | 0.539 | 1.764 | 0.004 | 0.045 | 44  | 0.522 | 1.624 | 0.002 | 0.121 | 44  | 0.299  | 0.949  | 0.538 | 0.730 |
| GO_REGULATION_OF_PLATELET_ACTIVATION             | 31  | 0.587 | 1.779 | 0.000 | 0.045 | 31  | 0.589 | 1.702 | 0.006 | 0.094 | 31  | 0.336  | 0.997  | 0.446 | 0.674 |
| GO_POSITIVE_REGULATION_OF_NERVOUS_SYSTEM_PROCESS | 62  | 0.510 | 1.780 | 0.000 | 0.045 | 62  | 0.479 | 1.629 | 0.014 | 0.123 | 62  | 0.408  | 1.396  | 0.038 | 0.365 |
| GO_GLYCOSYL_COMPOUND_BIOSYNTHETIC_PROCESS        | 39  | 0.560 | 1.763 | 0.004 | 0.046 | 39  | 0.584 | 1.793 | 0.000 | 0.062 | 39  | 0.320  | 1.010  | 0.448 | 0.660 |
| REACTOME_METABOLISM_OF_POLYAMINES                | 58  | 0.497 | 1.689 | 0.004 | 0.046 | 58  | 0.544 | 1.837 | 0.000 | 0.019 | 58  | 0.567  | 1.927  | 0.000 | 0.006 |

|                                                                            |     |       |       |       |       |     |       |       |       |       |     |        |        |       |       |
|----------------------------------------------------------------------------|-----|-------|-------|-------|-------|-----|-------|-------|-------|-------|-----|--------|--------|-------|-------|
| REACTOME_EXTRACELLULAR_MATRIX_ORGANIZATION                                 | 293 | 0.395 | 1.692 | 0.000 | 0.046 | 293 | 0.359 | 1.500 | 0.000 | 0.126 | 293 | 0.247  | 1.040  | 0.325 | 0.648 |
| GO_POSITIVE_REGULATION_OF_VASCULAR_ASSOCIATED_SMOOTH_MUSCLE_CELL_MIGRATION | 16  | 0.666 | 1.758 | 0.006 | 0.046 | 16  | 0.748 | 1.877 | 0.000 | 0.037 | 16  | 0.651  | 1.678  | 0.006 | 0.187 |
| REACTOME_NEUREXINS_AND_NEUROLIGINS                                         | 56  | 0.489 | 1.682 | 0.000 | 0.046 | 56  | 0.403 | 1.323 | 0.078 | 0.252 | 56  | 0.401  | 1.348  | 0.065 | 0.290 |
| REACTOME_SYNTHESIS_OF_SUBSTRATES_IN_N_GLYCAN_BIOSYTHESIS                   | 60  | 0.492 | 1.693 | 0.000 | 0.046 | 60  | 0.510 | 1.734 | 0.002 | 0.041 | 60  | 0.437  | 1.480  | 0.020 | 0.176 |
| GO_NUCLEOSIDE_SALVAGE                                                      | 15  | 0.700 | 1.759 | 0.010 | 0.046 | 15  | 0.689 | 1.702 | 0.012 | 0.095 | 15  | 0.432  | 1.087  | 0.352 | 0.577 |
| GO_REGULATION_OF_LYMPHOCYTE_MIGRATION                                      | 58  | 0.512 | 1.758 | 0.000 | 0.046 | 58  | 0.393 | 1.324 | 0.071 | 0.266 | 58  | -0.309 | -1.045 | 0.371 | 0.724 |
| REACTOME_SEMAPHORIN_INTERACTIONS                                           | 62  | 0.485 | 1.689 | 0.000 | 0.047 | 62  | 0.511 | 1.735 | 0.000 | 0.042 | 62  | 0.370  | 1.253  | 0.110 | 0.410 |
| REACTOME_RHO_GTPASES_ACTIVATE_PAKS                                         | 20  | 0.621 | 1.683 | 0.006 | 0.047 | 20  | 0.431 | 1.167 | 0.267 | 0.412 | 20  | -0.336 | -0.916 | 0.572 | 0.867 |
| GO_NON_CANONICAL_WNT_SIGNALING_PATHWAY                                     | 149 | 0.442 | 1.759 | 0.000 | 0.047 | 149 | 0.451 | 1.729 | 0.000 | 0.081 | 149 | 0.398  | 1.553  | 0.000 | 0.258 |

|                                                                                              |     |       |       |       |       |     |       |       |       |       |     |        |        |       |       |
|----------------------------------------------------------------------------------------------|-----|-------|-------|-------|-------|-----|-------|-------|-------|-------|-----|--------|--------|-------|-------|
| GO_ZYMOGEN_ACTIVATION                                                                        | 51  | 0.526 | 1.756 | 0.000 | 0.047 | 51  | 0.432 | 1.405 | 0.044 | 0.224 | 51  | 0.384  | 1.251  | 0.140 | 0.441 |
| GO_INTERLEUKIN_6_SECRETION                                                                   | 45  | 0.543 | 1.760 | 0.002 | 0.047 | 45  | 0.397 | 1.263 | 0.141 | 0.311 | 45  | -0.303 | -0.960 | 0.533 | 0.796 |
| REACTOME_L1CAM_INTERACTIONS                                                                  | 116 | 0.442 | 1.693 | 0.000 | 0.047 | 116 | 0.463 | 1.699 | 0.000 | 0.049 | 116 | 0.419  | 1.572  | 0.002 | 0.118 |
| REACTOME_P75_NTR_RECEPTOR_MEDIATED_SIGNALLING                                                | 94  | 0.454 | 1.697 | 0.000 | 0.047 | 94  | 0.436 | 1.566 | 0.004 | 0.095 | 94  | 0.371  | 1.346  | 0.043 | 0.291 |
| REACTOME_PURINE_CATABOLISM                                                                   | 18  | 0.631 | 1.695 | 0.010 | 0.048 | 18  | 0.557 | 1.442 | 0.070 | 0.157 | 18  | 0.590  | 1.551  | 0.044 | 0.127 |
| GO_ACTIN_FILAMENT_POLYMERIZATION                                                             | 163 | 0.432 | 1.752 | 0.000 | 0.048 | 163 | 0.464 | 1.815 | 0.000 | 0.056 | 163 | 0.431  | 1.700  | 0.000 | 0.188 |
| GO_ANTIGEN_PROCESSING_AND_PRESENTATION_OF_PEPTIDE_OR_POLYSACCHARIDE_ANTIGEN_VIA_MHC_CLASS_II | 100 | 0.466 | 1.751 | 0.000 | 0.048 | 100 | 0.337 | 1.232 | 0.108 | 0.335 | 100 | 0.260  | 0.963  | 0.540 | 0.715 |
| GO_PYRIMIDINE_RIBONUCLEOSIDE_TRIPHOSPHATE_METABOLIC_PROCESS                                  | 15  | 0.702 | 1.753 | 0.000 | 0.048 | 15  | 0.694 | 1.748 | 0.008 | 0.080 | 15  | 0.596  | 1.475  | 0.059 | 0.314 |
| GO_DEVELOPMENTAL_CELL_GROWTH                                                                 | 216 | 0.421 | 1.747 | 0.000 | 0.049 | 216 | 0.431 | 1.750 | 0.000 | 0.079 | 216 | 0.343  | 1.419  | 0.004 | 0.346 |

|                                                                 |     |       |       |       |       |     |       |       |       |       |     |        |        |       |       |
|-----------------------------------------------------------------|-----|-------|-------|-------|-------|-----|-------|-------|-------|-------|-----|--------|--------|-------|-------|
| GO_COLLAGEN_FIBRIL_ORGANIZATION                                 | 52  | 0.527 | 1.746 | 0.000 | 0.049 | 52  | 0.460 | 1.499 | 0.016 | 0.173 | 52  | 0.351  | 1.160  | 0.214 | 0.514 |
| GO_RHO_PROTEIN_SIGNAL_TRANSDUCTION                              | 192 | 0.426 | 1.747 | 0.000 | 0.049 | 192 | 0.400 | 1.592 | 0.000 | 0.135 | 192 | 0.273  | 1.107  | 0.183 | 0.562 |
| REACTOME_NUCLEOBASE_CATABOLISM                                  | 36  | 0.539 | 1.675 | 0.006 | 0.049 | 36  | 0.527 | 1.617 | 0.004 | 0.074 | 36  | 0.499  | 1.521  | 0.014 | 0.150 |
| GO_POSITIVE_REGULATION_OF_CELL_ADHESION                         | 385 | 0.394 | 1.740 | 0.000 | 0.049 | 385 | 0.381 | 1.625 | 0.000 | 0.122 | 385 | 0.311  | 1.347  | 0.004 | 0.396 |
| GO_SPINAL_CORD_DEVELOPMENT                                      | 103 | 0.457 | 1.743 | 0.000 | 0.049 | 103 | 0.321 | 1.177 | 0.162 | 0.387 | 103 | -0.234 | -0.872 | 0.743 | 0.880 |
| GO_POSITIVE_REGULATION_OF_MYOTUBE_DIFFERENTIATION               | 30  | 0.587 | 1.747 | 0.000 | 0.049 | 30  | 0.587 | 1.743 | 0.002 | 0.079 | 30  | 0.459  | 1.370  | 0.075 | 0.380 |
| GO_SUBSTRATE_DEPENDENT_CELL_MIGRATION                           | 27  | 0.608 | 1.744 | 0.006 | 0.049 | 27  | 0.577 | 1.638 | 0.012 | 0.117 | 27  | 0.502  | 1.494  | 0.042 | 0.296 |
| GO_POSITIVE_REGULATION_OF_EXTRINSIC_APOPTOTIC_SIGNALING_PATHWAY | 48  | 0.525 | 1.738 | 0.000 | 0.050 | 48  | 0.414 | 1.328 | 0.086 | 0.264 | 48  | 0.365  | 1.171  | 0.188 | 0.507 |
| GO_REGULATION_OF_RHO_PROTEIN_SIGNAL_TRANSDUCTION                | 132 | 0.444 | 1.740 | 0.000 | 0.050 | 132 | 0.422 | 1.610 | 0.000 | 0.128 | 132 | 0.302  | 1.158  | 0.170 | 0.514 |

|                                                      |     |       |       |       |       |     |       |       |       |       |     |       |       |       |       |
|------------------------------------------------------|-----|-------|-------|-------|-------|-----|-------|-------|-------|-------|-----|-------|-------|-------|-------|
| GO_POSITIVE_REGULATION_OF_INTERLEUKIN_2_PRODUCTION   | 31  | 0.582 | 1.741 | 0.002 | 0.050 | 31  | 0.572 | 1.693 | 0.002 | 0.094 | 31  | 0.380 | 1.128 | 0.274 | 0.542 |
| GO_NEGATIVE_REGULATION_OF_RESPONSE_TO_WOUNDING       | 86  | 0.472 | 1.741 | 0.000 | 0.050 | 86  | 0.463 | 1.651 | 0.000 | 0.111 | 86  | 0.418 | 1.534 | 0.009 | 0.265 |
| GO_POSITIVE_REGULATION_OF_CHEMOTAXIS                 | 131 | 0.451 | 1.747 | 0.000 | 0.050 | 131 | 0.423 | 1.615 | 0.000 | 0.125 | 131 | 0.345 | 1.311 | 0.033 | 0.415 |
| REACTOME_ASYMMETRIC_LOCALIZATION_OF_PCP_PROTEINS     | 63  | 0.474 | 1.658 | 0.004 | 0.050 | 63  | 0.521 | 1.753 | 0.002 | 0.040 | 63  | 0.572 | 1.959 | 0.000 | 0.006 |
| REACTOME_VIF_MEDIATED_DEGRADATION_OF_APOBEC3G        | 51  | 0.502 | 1.662 | 0.004 | 0.051 | 51  | 0.574 | 1.885 | 0.000 | 0.017 | 51  | 0.635 | 2.115 | 0.000 | 0.001 |
| HALLMARK_ANDROGEN_RESPONSE                           | 95  | 0.360 | 1.336 | 0.046 | 0.055 | 95  | 0.448 | 1.623 | 0.000 | 0.006 | 95  | 0.406 | 1.494 | 0.012 | 0.036 |
| REACTOME_DEGRADATION_OF_AXIN                         | 54  | 0.479 | 1.625 | 0.006 | 0.062 | 54  | 0.566 | 1.861 | 0.000 | 0.016 | 54  | 0.612 | 2.026 | 0.000 | 0.001 |
| GO_CORTICAL_CYTOSKELETON_ORGANIZATION                | 47  | 0.515 | 1.698 | 0.002 | 0.062 | 47  | 0.602 | 1.957 | 0.000 | 0.018 | 47  | 0.591 | 1.937 | 0.000 | 0.066 |
| REACTOME_REGULATION_OF_RUNX1_EXPRESSION_AND_ACTIVITY | 17  | 0.625 | 1.621 | 0.024 | 0.062 | 17  | 0.687 | 1.737 | 0.002 | 0.042 | 17  | 0.616 | 1.593 | 0.023 | 0.107 |

|                                                                                |     |       |       |       |       |     |       |       |       |       |     |       |       |       |       |
|--------------------------------------------------------------------------------|-----|-------|-------|-------|-------|-----|-------|-------|-------|-------|-----|-------|-------|-------|-------|
| GO_REGULATION_OF_SUBSTRATE_ADHESION_DEPENDENT_CELL_SPREADING                   | 48  | 0.508 | 1.699 | 0.008 | 0.063 | 48  | 0.590 | 1.886 | 0.000 | 0.035 | 48  | 0.500 | 1.626 | 0.004 | 0.210 |
| REACTOME_FACTORS_INVOLVED_IN_MEGAKARYOCYTE_DEVELOPMENT_AND_PLATELET_PRODUCTION | 158 | 0.405 | 1.609 | 0.000 | 0.066 | 158 | 0.447 | 1.752 | 0.000 | 0.039 | 158 | 0.371 | 1.476 | 0.004 | 0.179 |
| REACTOME_FBXL7_DOWN_REGULATES_AURKA_DURING_MITOTIC_ENTRY_AND_IN_EARLY_MITOSIS  | 54  | 0.473 | 1.605 | 0.004 | 0.066 | 54  | 0.534 | 1.762 | 0.000 | 0.043 | 54  | 0.590 | 1.933 | 0.000 | 0.006 |
| GO_REGULATION_OF_LAMELLIPODIUM_ASSEMBLY                                        | 28  | 0.572 | 1.681 | 0.006 | 0.067 | 28  | 0.644 | 1.894 | 0.000 | 0.034 | 28  | 0.620 | 1.790 | 0.000 | 0.135 |
| GO_POSITIVE_REGULATION_OF_EPITHELIAL_CELL_MIGRATION                            | 136 | 0.426 | 1.670 | 0.000 | 0.071 | 136 | 0.498 | 1.919 | 0.000 | 0.025 | 136 | 0.459 | 1.789 | 0.000 | 0.130 |
| GO_POSITIVE_REGULATION_OF_DEFENSE_RESPONSE_TO_VIRUS_BY_HOST                    | 23  | 0.586 | 1.659 | 0.013 | 0.074 | 23  | 0.674 | 1.853 | 0.002 | 0.042 | 23  | 0.607 | 1.667 | 0.014 | 0.200 |
| REACTOME_THE_ROLE_OF_GTSE1_IN_G2_M_PROGRESSION_AFTER_G2_CHECKPOINT             | 77  | 0.440 | 1.584 | 0.004 | 0.074 | 77  | 0.521 | 1.807 | 0.000 | 0.027 | 77  | 0.494 | 1.738 | 0.002 | 0.037 |
| REACTOME_SIGNALING_BY_THE_B_CELL_RECEPTOR_BCR                                  | 109 | 0.414 | 1.580 | 0.000 | 0.076 | 109 | 0.422 | 1.559 | 0.009 | 0.095 | 109 | 0.473 | 1.796 | 0.000 | 0.023 |
| REACTOME_DEGRADATION_OF_DVL                                                    | 56  | 0.463 | 1.572 | 0.011 | 0.079 | 56  | 0.511 | 1.707 | 0.004 | 0.049 | 56  | 0.573 | 1.946 | 0.000 | 0.006 |



|                                                                     |     |       |       |       |       |     |       |       |       |       |     |       |       |       |       |
|---------------------------------------------------------------------|-----|-------|-------|-------|-------|-----|-------|-------|-------|-------|-----|-------|-------|-------|-------|
| REACTOME_SURFACTANT_METABOLISM                                      | 25  | 0.533 | 1.567 | 0.015 | 0.081 | 25  | 0.586 | 1.633 | 0.014 | 0.066 | 25  | 0.628 | 1.729 | 0.002 | 0.040 |
| REACTOME_CROSS_PRESENTATION_OF_SOLUBLE_EXOGENOUS_ANTIGENS_ENDOSOMES | 48  | 0.469 | 1.551 | 0.011 | 0.088 | 48  | 0.549 | 1.740 | 0.004 | 0.043 | 48  | 0.630 | 2.055 | 0.000 | 0.001 |
| REACTOME_TNFR2_NON_CANONICAL_NF_KB_PATHWAY                          | 96  | 0.413 | 1.548 | 0.004 | 0.088 | 96  | 0.475 | 1.711 | 0.000 | 0.049 | 96  | 0.514 | 1.881 | 0.000 | 0.011 |
| REACTOME_DEGRADATION_OF_GLI1_BY_THE_PROTEASOME                      | 59  | 0.451 | 1.545 | 0.017 | 0.088 | 59  | 0.514 | 1.733 | 0.002 | 0.040 | 59  | 0.546 | 1.870 | 0.000 | 0.012 |
| REACTOME_ADHERENS_JUNCTIONS_INTERACTIONS                            | 28  | 0.528 | 1.540 | 0.021 | 0.090 | 28  | 0.592 | 1.697 | 0.002 | 0.049 | 28  | 0.575 | 1.700 | 0.006 | 0.053 |
| REACTOME_INTERFERON_SIGNALING                                       | 192 | 0.376 | 1.530 | 0.000 | 0.096 | 192 | 0.425 | 1.695 | 0.000 | 0.049 | 192 | 0.379 | 1.528 | 0.000 | 0.144 |
| REACTOME_UCH_PROTEINASES                                            | 99  | 0.410 | 1.522 | 0.004 | 0.099 | 99  | 0.484 | 1.792 | 0.000 | 0.031 | 99  | 0.504 | 1.884 | 0.000 | 0.012 |
| REACTOME_INTERFERON_ALPHA_BETA_SIGNALING                            | 66  | 0.426 | 1.498 | 0.018 | 0.109 | 66  | 0.491 | 1.707 | 0.000 | 0.050 | 66  | 0.394 | 1.378 | 0.046 | 0.251 |
| REACTOME_SCF_SKP2_MEDIATED_DEGRADATION_OF_P27_P21                   | 59  | 0.434 | 1.473 | 0.022 | 0.124 | 59  | 0.507 | 1.700 | 0.004 | 0.050 | 59  | 0.553 | 1.869 | 0.000 | 0.011 |

|                                                           |    |       |       |       |       |    |       |       |       |       |    |       |       |       |       |
|-----------------------------------------------------------|----|-------|-------|-------|-------|----|-------|-------|-------|-------|----|-------|-------|-------|-------|
| REACTOME_NEGATIVE_REGULATION_OF_NOTCH4_SIGNALING          | 53 | 0.423 | 1.436 | 0.023 | 0.144 | 53 | 0.479 | 1.578 | 0.012 | 0.092 | 53 | 0.557 | 1.846 | 0.002 | 0.013 |
| REACTOME_ASSEMBLY_OF_THE_PRE_REPLICATIVE_COMPLEX          | 67 | 0.402 | 1.425 | 0.024 | 0.152 | 67 | 0.511 | 1.758 | 0.000 | 0.041 | 67 | 0.592 | 2.058 | 0.000 | 0.001 |
| REACTOME_NUCLEOTIDE_SALVAGE                               | 22 | 0.497 | 1.397 | 0.076 | 0.165 | 22 | 0.650 | 1.755 | 0.002 | 0.040 | 22 | 0.369 | 1.018 | 0.438 | 0.675 |
| REACTOME_DECTIN_1_MEDIATED_NONCANONICAL_NF_KB_SIGNALING   | 61 | 0.406 | 1.398 | 0.046 | 0.165 | 61 | 0.436 | 1.466 | 0.021 | 0.144 | 61 | 0.528 | 1.769 | 0.000 | 0.029 |
| REACTOME_G1_S_DNA_DAMAGE_CHECKPOINTS                      | 66 | 0.393 | 1.383 | 0.049 | 0.174 | 66 | 0.494 | 1.675 | 0.004 | 0.056 | 66 | 0.532 | 1.851 | 0.000 | 0.013 |
| REACTOME_REGULATION_OF_APOPTOSIS                          | 52 | 0.401 | 1.361 | 0.067 | 0.190 | 52 | 0.501 | 1.629 | 0.002 | 0.068 | 52 | 0.550 | 1.845 | 0.002 | 0.013 |
| REACTOME_DEFECTIVE_CFTR_CAUSES_CYSTIC_FIBROSIS            | 60 | 0.388 | 1.329 | 0.072 | 0.213 | 60 | 0.477 | 1.589 | 0.006 | 0.086 | 60 | 0.576 | 1.945 | 0.000 | 0.006 |
| REACTOME_ORC1_REMOVAL_FROM_CHROMATIN                      | 70 | 0.370 | 1.315 | 0.052 | 0.224 | 70 | 0.484 | 1.661 | 0.000 | 0.064 | 70 | 0.603 | 2.111 | 0.000 | 0.000 |
| REACTOME_CDK_MEDIATED_PHOSPHORYLATION_AND_REMOVAL_OF_CDC6 | 71 | 0.366 | 1.315 | 0.072 | 0.225 | 71 | 0.466 | 1.572 | 0.006 | 0.094 | 71 | 0.533 | 1.847 | 0.000 | 0.013 |

---

|                                                           |    |       |       |       |       |    |        |        |       |       |    |        |        |       |       |
|-----------------------------------------------------------|----|-------|-------|-------|-------|----|--------|--------|-------|-------|----|--------|--------|-------|-------|
| REACTOME_STABILIZATION_OF_P53                             | 55 | 0.378 | 1.271 | 0.101 | 0.261 | 55 | 0.498  | 1.633  | 0.002 | 0.067 | 55 | 0.579  | 1.954  | 0.000 | 0.006 |
| HALLMARK_IL6_JAK_STAT3_SIGNALING                          | 87 | 0.295 | 1.084 | 0.276 | 0.267 | 87 | -0.319 | -1.134 | 0.204 | 0.311 | 87 | -0.471 | -1.686 | 0.000 | 0.015 |
| REACTOME_HEDGEHOG_LIGAND_BIOGENESIS                       | 64 | 0.348 | 1.217 | 0.138 | 0.311 | 64 | 0.464  | 1.560  | 0.006 | 0.095 | 64 | 0.540  | 1.860  | 0.000 | 0.012 |
| REACTOME_AUF1_HNRNP_D0_BINDS_AND_DESTABILIZES_MRNA        | 54 | 0.356 | 1.218 | 0.131 | 0.312 | 54 | 0.456  | 1.493  | 0.019 | 0.130 | 54 | 0.557  | 1.855  | 0.000 | 0.013 |
| REACTOME_ACTIVATION_OF_NF_KAPPAB_IN_B_CELLS               | 66 | 0.344 | 1.206 | 0.142 | 0.329 | 66 | 0.407  | 1.406  | 0.032 | 0.179 | 66 | 0.514  | 1.784  | 0.000 | 0.025 |
| REACTOME_REGULATION_OF_PTEN_STABILITY_AND_ACTIVITY        | 67 | 0.343 | 1.197 | 0.156 | 0.336 | 67 | 0.443  | 1.521  | 0.019 | 0.116 | 67 | 0.504  | 1.760  | 0.000 | 0.029 |
| REACTOME_CYTOSOLIC_TRNA_AMINOACYLATION                    | 24 | 0.397 | 1.128 | 0.302 | 0.428 | 24 | 0.536  | 1.468  | 0.062 | 0.142 | 24 | 0.626  | 1.767  | 0.006 | 0.029 |
| REACTOME_SWITCHING_OF_ORIGINS_TO_A_POST_REPLICATIVE_STATE | 89 | 0.296 | 1.105 | 0.257 | 0.450 | 89 | 0.419  | 1.473  | 0.010 | 0.140 | 89 | 0.523  | 1.883  | 0.000 | 0.011 |
| REACTOME_DNA_REPLICATION_PRE_INITIATION                   | 84 | 0.296 | 1.078 | 0.291 | 0.484 | 84 | 0.435  | 1.546  | 0.006 | 0.103 | 84 | 0.528  | 1.913  | 0.000 | 0.008 |

---

---

ES, enrichment score; NES, normalized enrichment score.
