# Supplementary material
Source: HighWire-hosted journal article supplement (https://rmdopen.bmj.com/content/9/1/e002694)
Supplement: inline-supplementary-material-9 [file inline-supplementary-material-9.pdf]

**Supplementary Table 7. Baseline characteristics of study participants allocated to the non-SjS control or SjS groups**

| Variables                                             | Overall (n=44)    | 2016 SjS Classification Criteria |                   | P-value |
|-------------------------------------------------------|-------------------|----------------------------------|-------------------|---------|
|                                                       |                   | non-SjS control Group (n=13)     | SjS Group (n=31)  |         |
| Sex, Female n (%)                                     | 38 (86.4)         | 13 (100.0)                       | 25 (80.6)         | 0.220   |
| Age at enrollment (Years), Mean (SD)                  | 42.23 (13.20)     | 41.08 (13.59)                    | 42.71 (13.23)     | 0.713   |
| Symptom duration at first visit (Years), Median [IQR] | 1.00 [0.31, 3.00] | 2.00 [0.50, 2.00]                | 1.00 [0.21, 3.00] | 0.727   |
| Dry eye, n (%)                                        | 20 (45.5)         | 8 (61.5)                         | 12 (38.7)         | 0.291   |
| Dry mouth, n (%)                                      | 29 (65.9)         | 9 (69.2)                         | 20 (64.5)         | 1.000   |
| Fever, n (%)                                          | 5 (11.4)          | 1 (7.7)                          | 4 (12.9)          | 1.000   |
| Fatigue, n (%)                                        | 10 (22.7)         | 0 (0.0)                          | 10 (32.3)         | 0.053   |
| Anti-SSA/Ro antibodies, n (%)                         | 27 (61.4)         | 0 (0.0)                          | 27 (87.1)         | <0.001  |
| Anti-SSB/La antibodies, n (%)                         | 11 (25.0)         | 1 (7.7)                          | 10 (32.3)         | 0.182   |
| ANA, n (%)                                            | 26 (59.1)         | 2 (15.4)                         | 24 (77.4)         | <0.001  |
| dsDNA, n (%)                                          | 0 (0.0)           | 0 (0.0)                          | 0 (0.0)           | N/A     |
| RF(IU/mL), Mean (SD)                                  | 45.62 (87.46)     | 29.85 (21.61)                    | 52.24 (103.08)    | 0.445   |
| ESR (mm/h), Mean (SD)                                 | 22.07 (19.57)     | 14.77 (6.76)                     | 25.13 (22.32)     | 0.110   |
| CRP (g/L), Mean (SD)                                  | 5.07 (20.03)      | 1.23 (1.22)                      | 6.86 (23.72)      | 0.401   |
| IgG (g/L), Mean (SD)                                  | 16.65 (5.89)      | 13.39 (1.96)                     | 18.01 (6.45)      | 0.016   |
| IgM(g/L), Mean (SD)                                   | 1.57 (1.31)       | 1.40 (0.40)                      | 1.64 (1.54)       | 0.584   |
| IgA(g/L), Mean (SD)                                   | 2.54 (1.00)       | 2.11 (0.41)                      | 2.71 (1.12)       | 0.066   |
| C3 (g/L), Mean (SD)                                   | 1.07 (0.20)       | 1.03 (0.21)                      | 1.09 (0.20)       | 0.387   |
| C4 (g/L), Mean (SD)                                   | 0.23 (0.07)       | 0.21 (0.05)                      | 0.24 (0.07)       | 0.318   |
| Lymphadenopathy, n (%)                                | 7 (15.9)          | 0 (0.0)                          | 7 (22.6)          | 0.157   |
| Active articular involvement, n (%)                   | 16 (36.4)         | 1 (7.7)                          | 15 (48.4)         | 0.027   |
| Active cutaneous involvement, n (%)                   | 9 (20.5)          | 0 (0.0)                          | 9 (29.0)          | 0.077   |
| Active pulmonary involvement, n (%)                   | 10 (22.7)         | 0 (0.0)                          | 10 (32.3)         | 0.053   |

---

|                                    |           |         |           |       |
|------------------------------------|-----------|---------|-----------|-------|
| Active renal involvement, n (%)    | 2 (4.5)   | 0 (0.0) | 2 (6.5)   | 0.885 |
| Active muscular involvement, n (%) | 3 (6.8)   | 0 (0.0) | 3 (9.7)   | 0.613 |
| Active PNS involvement, n (%)      | 1 (2.3)   | 0 (0.0) | 1 (3.2)   | 1.000 |
| Active CNS involvement, n (%)      | 0 (0.0)   | 0 (0.0) | 0 (0.0)   | N/A   |
| Hematological involvement, n (%)   | 7 (15.9)  | 0 (0.0) | 7 (22.6)  | 0.157 |
| Focus score $\geq$ 1, n (%)        | 14 (31.8) | 0 (0.0) | 14 (45.2) | 0.010 |

---
