# Supplementary material
Source: HighWire-hosted journal article supplement (https://rmdopen.bmj.com/content/9/1/e002694)
Supplement: inline-supplementary-material-10 [file inline-supplementary-material-10.pdf]

**Supplementary Table 8. Baseline characteristics of study participants for the p-STATA1-negative and p-STATA1-positive groups**

| Variables                                             | Overall (n=44)    | p-STATA1          |                   | P-value |
|-------------------------------------------------------|-------------------|-------------------|-------------------|---------|
|                                                       |                   | Negative (n=14)   | Positive(n=30)    |         |
| Sex, Female n (%)                                     | 38 (86.4)         | 14 (100.0)        | 24 (80.0)         | 0.184   |
| Age at enrollment (Years), Mean (SD)                  | 42.23 (13.20)     | 41.50 (13.15)     | 42.57 (13.43)     | 0.806   |
| Symptom duration at first visit (Years), Median [IQR] | 1.00 [0.31, 3.00] | 2.00 [0.50, 2.75] | 1.00 [0.18, 3.00] | 0.509   |
| Dry eye, n (%)                                        | 20 (45.5)         | 8 (57.1)          | 12 (40.0)         | 0.460   |
| Dry mouth, n (%)                                      | 29 (65.9)         | 9 (64.3)          | 20 (66.7)         | 1.000   |
| Fever, n (%)                                          | 5 (11.4)          | 1 (7.1)           | 4 (13.3)          | 0.926   |
| Fatigue, n (%)                                        | 10 (22.7)         | 1 (7.1)           | 9 (30.0)          | 0.194   |
| Anti-SSA/Ro antibodies, n (%)                         | 27 (61.4)         | 1 (7.1)           | 26 (86.7)         | <0.001  |
| Anti-SSB/La antibodies, n (%)                         | 11 (25.0)         | 1 (7.1)           | 10 (33.3)         | 0.135   |
| ANA, n (%)                                            | 26 (59.1)         | 3 (21.4)          | 23 (76.7)         | 0.002   |
| dsDNA, n (%)                                          | 0 (0.0)           | 0 (0.0)           | 0 (0.0)           | N/A     |
| RF(IU/mL), Mean (SD)                                  | 45.62 (87.46)     | 69.93 (151.40)    | 34.28 (25.46)     | 0.212   |
| ESR (mm/h), Mean (SD)                                 | 22.07 (19.57)     | 15.93 (7.81)      | 24.93 (22.67)     | 0.158   |
| CRP (g/L), Mean (SD)                                  | 5.20 (19.99)      | 1.22 (1.18)       | 7.05 (24.10)      | 0.373   |
| IgG (g/L), Mean (SD)                                  | 16.65 (5.89)      | 13.32 (1.90)      | 18.20 (6.48)      | 0.009   |
| IgM(g/L), Mean (SD)                                   | 1.57 (1.31)       | 1.43 (0.40)       | 1.63 (1.56)       | 0.633   |
| IgA(g/L), Mean (SD)                                   | 2.54 (1.00)       | 2.15 (0.43)       | 2.71 (1.14)       | 0.084   |
| C3 (g/L), Mean (SD)                                   | 1.07 (0.20)       | 1.04 (0.20)       | 1.09 (0.20)       | 0.393   |
| C4 (g/L), Mean (SD)                                   | 0.23 (0.07)       | 0.22 (0.05)       | 0.23 (0.07)       | 0.487   |
| Lymphadenopathy, n (%)                                | 7 (15.9)          | 0 (0.0)           | 7 (23.3)          | 0.126   |
| Active articular involvement, n (%)                   | 16 (36.4)         | 2 (14.3)          | 14 (46.7)         | 0.081   |
| Active cutaneous involvement, n (%)                   | 9 (20.5)          | 0 (0.0)           | 9 (30.0)          | 0.058   |
| Active pulmonary involvement, n (%)                   | 10 (22.7)         | 1 (7.1)           | 9 (30.0)          | 0.194   |

---

|                                    |           |         |           |       |
|------------------------------------|-----------|---------|-----------|-------|
| Active renal involvement, n (%)    | 2 (4.5)   | 0 (0.0) | 2 (6.7)   | 0.832 |
| Active muscular involvement, n (%) | 3 (6.8)   | 0 (0.0) | 3 (10.0)  | 0.559 |
| Active PNS involvement, n (%)      | 1 (2.3)   | 0 (0.0) | 1 (3.3)   | 1.000 |
| Active CNS involvement, n (%)      | 0 (0.0)   | 0 (0.0) | 0 (0.0)   | N/A   |
| Hematological involvement, n (%)   | 7 (15.9)  | 1 (7.1) | 6 (20.0)  | 0.520 |
| Focus score $\geq$ 1, n (%)        | 14 (31.8) | 0 (0.0) | 14 (46.7) | 0.006 |

---
