# Supplementary material
Source: HighWire-hosted journal article supplement (https://rmdopen.bmj.com/content/9/1/e002694)
Supplement: inline-supplementary-material-13 [file inline-supplementary-material-13.pdf]

**Supplementary Table 9. The differences in the p-STAT1 IOD values between the non-SjS control and SjS groups**

| Variables                     | Overall (n=44)      | 2016 pSS Classification Criteria |                    | P - value |
|-------------------------------|---------------------|----------------------------------|--------------------|-----------|
|                               |                     | non-SjS control Group (n=13)     | SjS Group (n=31)   |           |
| <b>p-STAT1 IOD, Mean (SD)</b> | 18493.22 (13114.43) | 3096.23 (1869.49)                | 24950.02 (9965.42) | <0.001    |

*P*-value calculated with the Student's t-test
