# Supplementary material
Source: HighWire-hosted journal article supplement (https://rmdopen.bmj.com/content/9/1/e002694)
Supplement: inline-supplementary-material-14 [file inline-supplementary-material-14.pdf]

**Supplementary Table 10. Cross tabulation-The distribution of the pathology markers' results according to the 2016 SjS Classification Criteria**

| Items           | Results  | 2016 pSS Classification Criteria (%) |                              | Total     | P-Value |
|-----------------|----------|--------------------------------------|------------------------------|-----------|---------|
|                 |          | SjS Group (n=31)                     | non-SjS control Group (n=13) |           |         |
| p-STAT1 (%)     | Negative | 1 (3.2)                              | 13 (100.0)                   | 14 (31.8) | <0.05   |
|                 | Positive | 30 (96.8)                            | 0 (0.0)                      | 30 (68.2) |         |
| <b>Total</b>    |          | 31                                   | 13                           | 44        |         |
| Focus Score (%) | Negative | 17 (54.8)                            | 13 (100.0)                   | 30 (68.2) | <0.05   |
|                 | Positive | 14 (45.2)                            | 0 (0.0)                      | 14 (31.8) |         |
| <b>Total</b>    |          | 31                                   | 13                           | 44        |         |

P-value calculated with the Chi-Square Test
